# Supplementary material for: Rapid prediction of possible inhibitors for SARS-CoV-2 main protease using docking and FPL simulations
Source: PubMed Central journal article supplement (PMC9056572; doi:10.1039/d0ra06212j), 2020-08-28
Supplement: RA-010-D0RA06212J-s001.pdf [file RA-010-D0RA06212J-s001.pdf]

Supporting Information

Rapid Prediction of Possible Inhibitors for SARS-  
CoV-2 Main Protease using Docking and FPL  
Simulations

*Minh Quan Pham,<sup>ab</sup> Khanh B. Vu,<sup>cd</sup> T. Ngoc Han Pham,<sup>e</sup> Le Thi Thuy Huong,<sup>ab</sup> Linh Hoang Tran,<sup>df</sup>*

*Nguyen Thanh Tung,<sup>ag</sup> Van V. Vu,<sup>h</sup> and Trung Hai Nguyen<sup>ij</sup> Son Tung Ngo,<sup>ij\*</sup>*

<sup>a</sup>Graduate University of Science and Technology, Vietnam Academy of Science and Technology, Hanoi, Vietnam

<sup>b</sup>Institute of Natural Products Chemistry, Vietnam Academy of Science and Technology, Hanoi, Vietnam

<sup>c</sup>School of Biotechnology, International University, Ho Chi Minh City, Vietnam

<sup>d</sup>Vietnam National University, Ho Chi Minh City, Vietnam

<sup>e</sup>Faculty of Pharmacy, Ton Duc Thang University, Ho Chi Minh City, Vietnam

<sup>f</sup>Faculty of Civil Engineering, Ho Chi Minh University of Technology (HCMUT), Ho Chi Minh, Vietnam

<sup>g</sup>Institute of Materials Science, Vietnam Academy of Science and Technology, Hanoi, Vietnam

<sup>h</sup>NTT Hi-Tech Institute, Nguyen Tat Thanh University, Ho Chi Minh City, Vietnam

<sup>i</sup>Laboratory of Theoretical and Computational Biophysics, Ton Duc Thang University, Ho Chi Minh City, Vietnam

<sup>j</sup>Faculty of Applied Sciences, Ton Duc Thang University, Ho Chi Minh City, Vietnam

\*Email: [ngosontung@tdtu.edu.vn](mailto:ngosontung@tdtu.edu.vn)

**Table 1.** Comparison of the docking results of available inhibitors on the SARS-CoV-2 monomer and dimer.

| N <sup>o</sup> | Name              | $\Delta G_{\text{Dock}}^{\text{Monomer}}$ | $\Delta G_{\text{Dock}}^{\text{Dimer}}$ |
|----------------|-------------------|-------------------------------------------|-----------------------------------------|
| 1              | <b>11r</b>        | -6.5                                      | -7.0                                    |
| 2              | <b>13a</b>        | -6.5                                      | -6.3                                    |
| 3              | <b>13b</b>        | -6.3                                      | -7.3                                    |
| 4              | <b>11a</b>        | -6.8                                      | -7.3                                    |
| 5              | <b>11b</b>        | -7.0                                      | -7.7                                    |
| 6              | <i>Carmofur</i>   | -5.7                                      | -5.9                                    |
| 7              | <i>Disulfiram</i> | -3.8                                      | -4.2                                    |
| 8              | <i>Ebselen</i>    | -5.6                                      | -6.2                                    |
| 9              | <i>PX-12</i>      | -3.8                                      | -4.1                                    |
| 10             | <i>Shikonin</i>   | -6.1                                      | -6.9                                    |
| 11             | <i>Tideglusib</i> | -6.6                                      | -6.6                                    |

The unit is in kcal mol<sup>-1</sup>.

**Table S2.** The Protein-Ligand Interaction Maps from Docking Conformation.

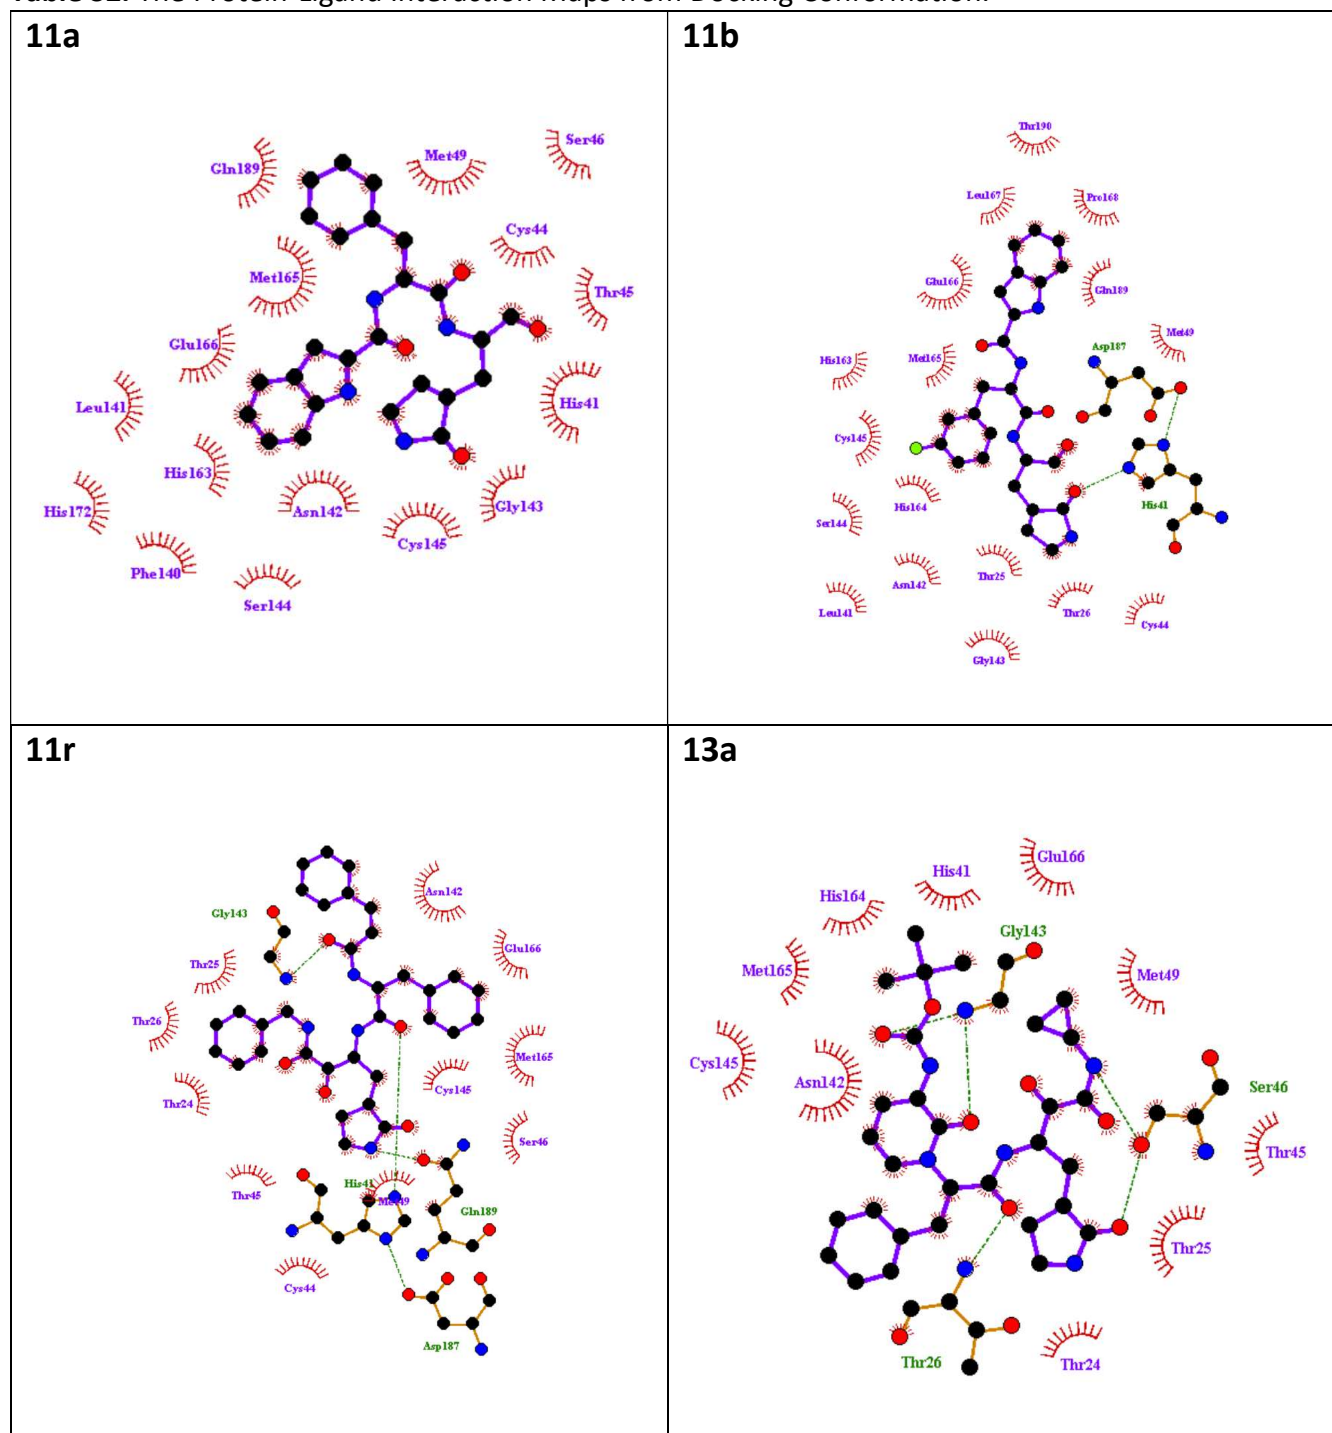

13b

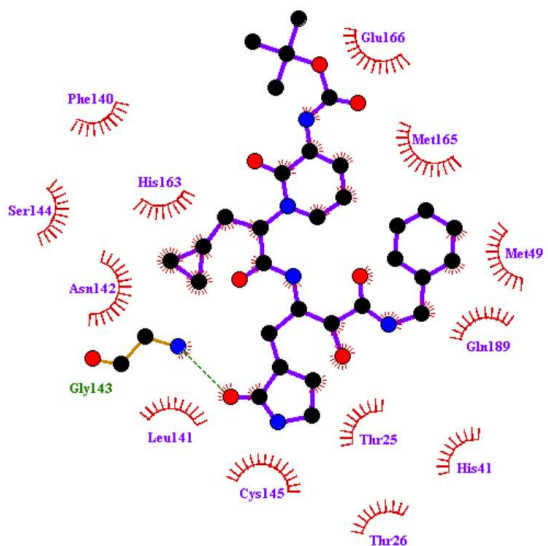

Carmofur

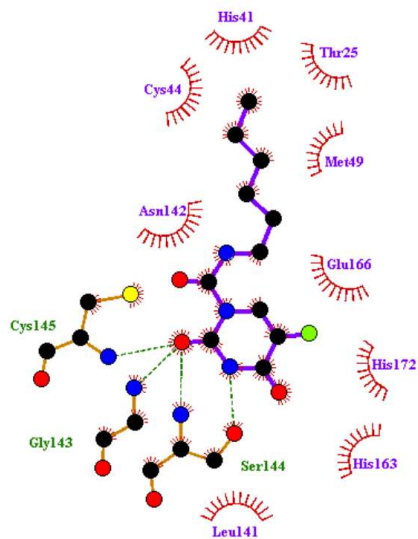

Disulfiram

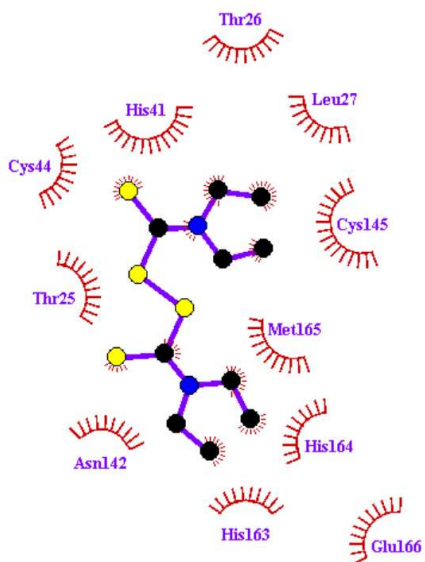

Ebselen

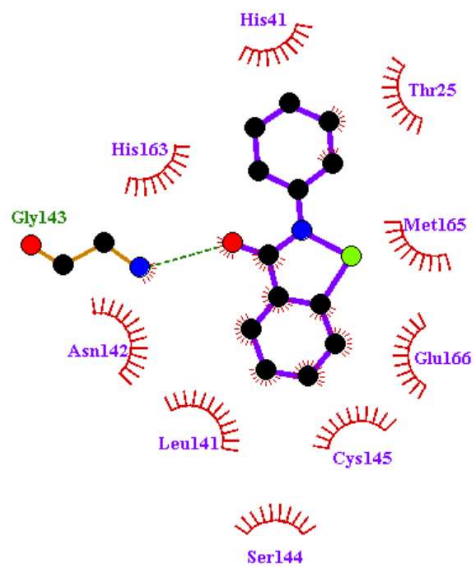

PX-12

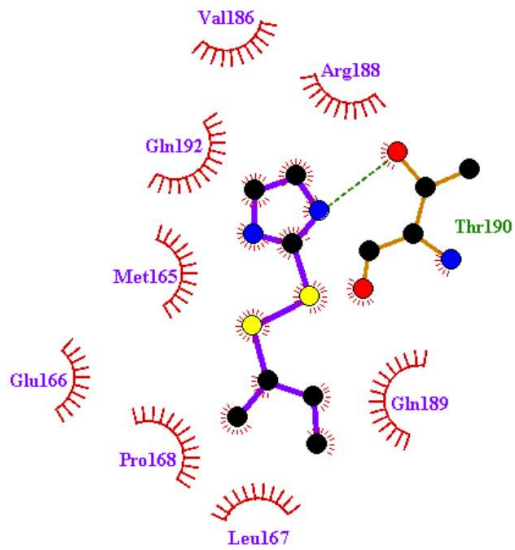

Shikonin

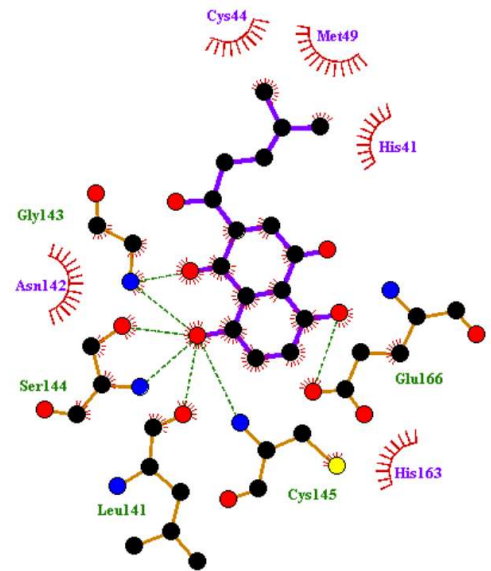

Tideglusib

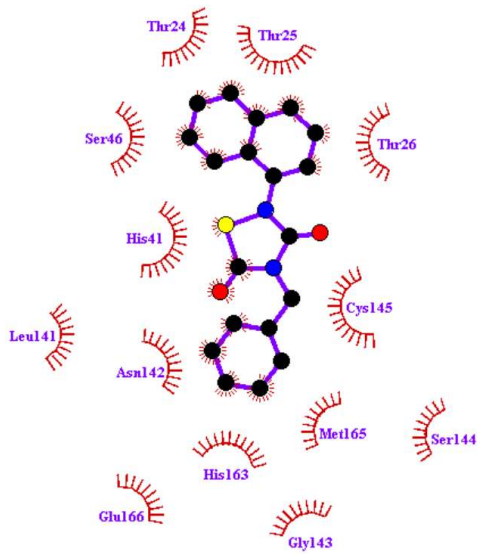

ZINC000256110404

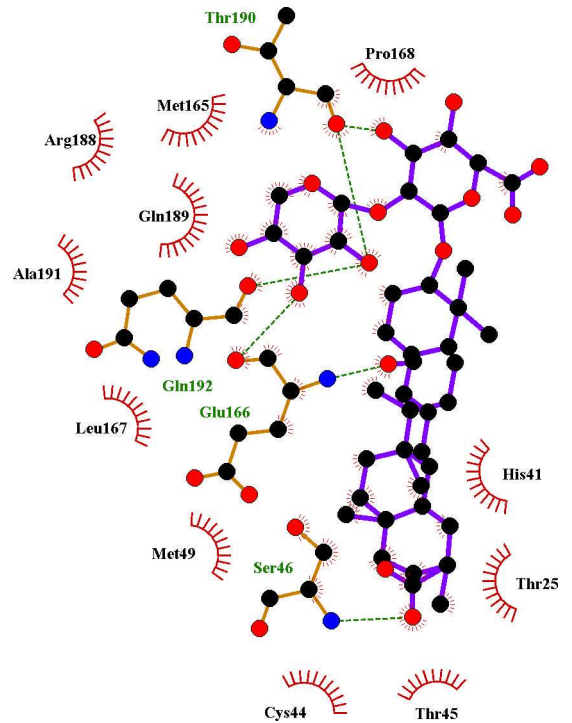

ZINC000085537131

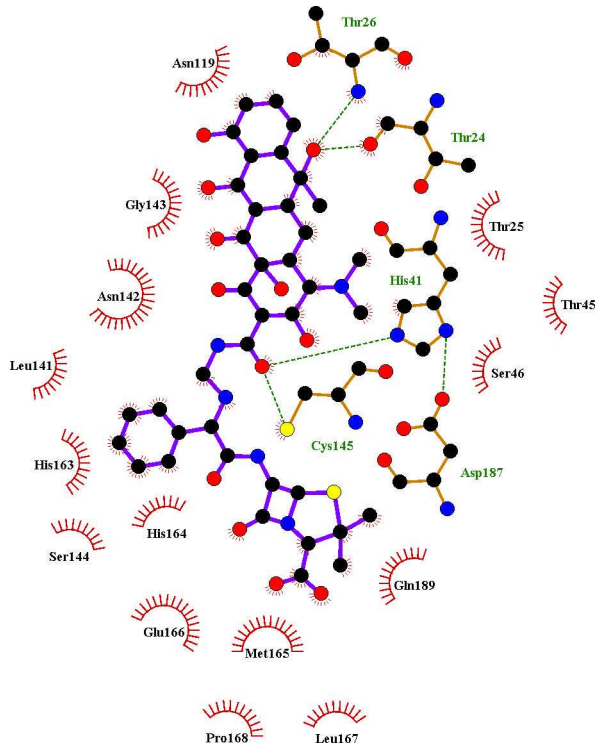

ZINC000100783644

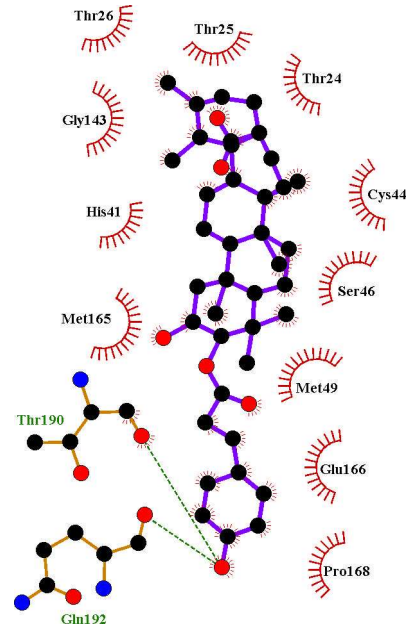

ZINC000253527863

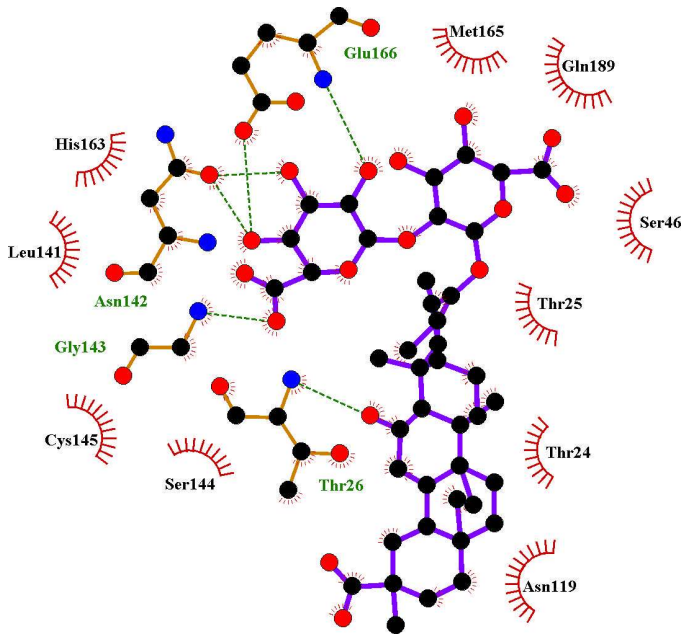

ZINC000256105139

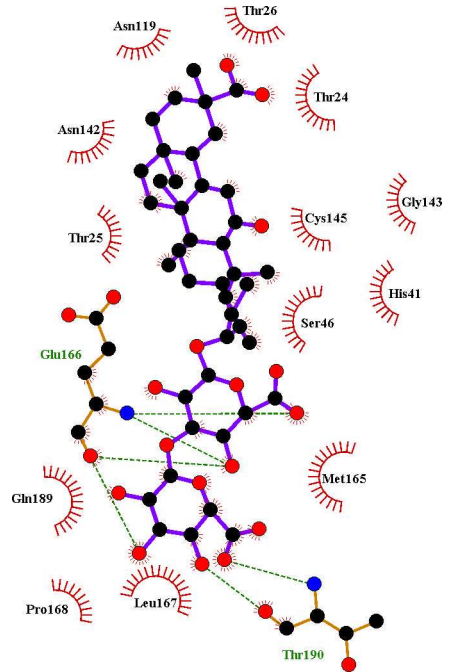

ZINC000100783815

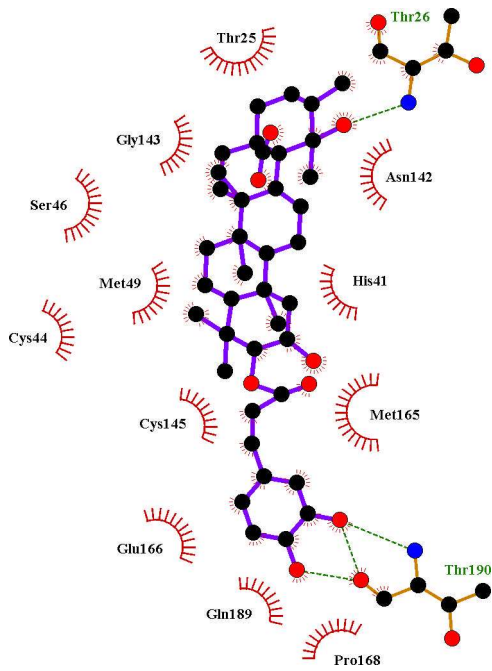

ZINC000004214527

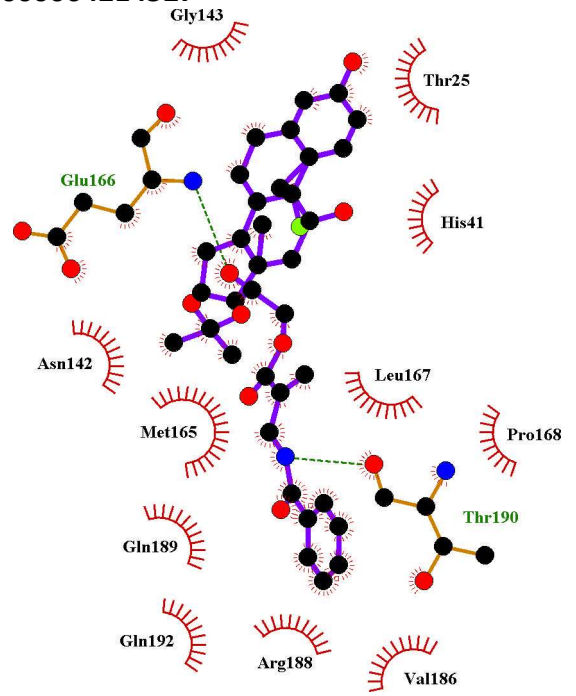

ZINC000028642721

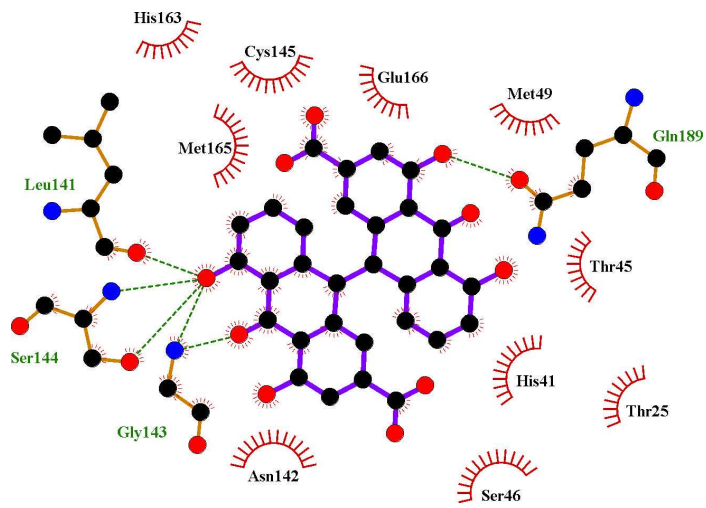

ZINC000100783890

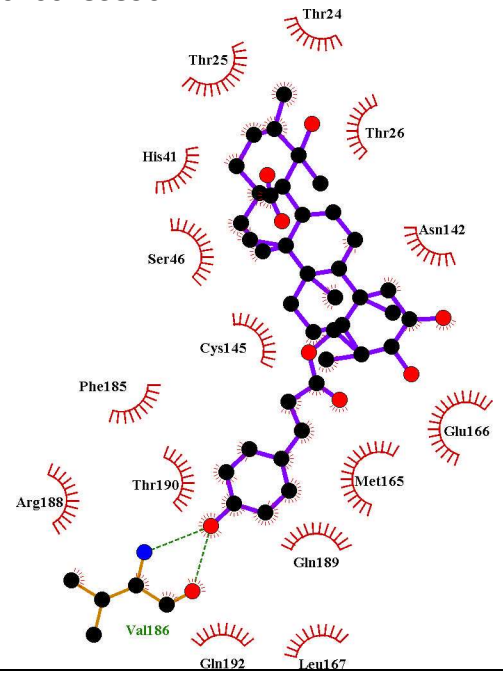

ZINC000098052857

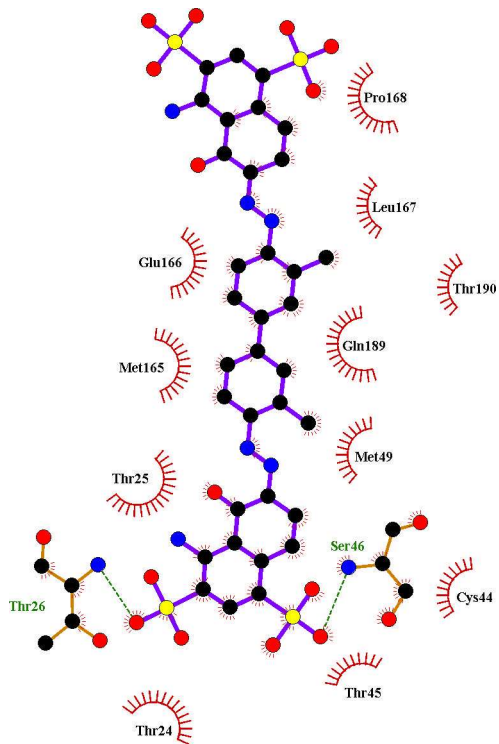

ZINC000100783691

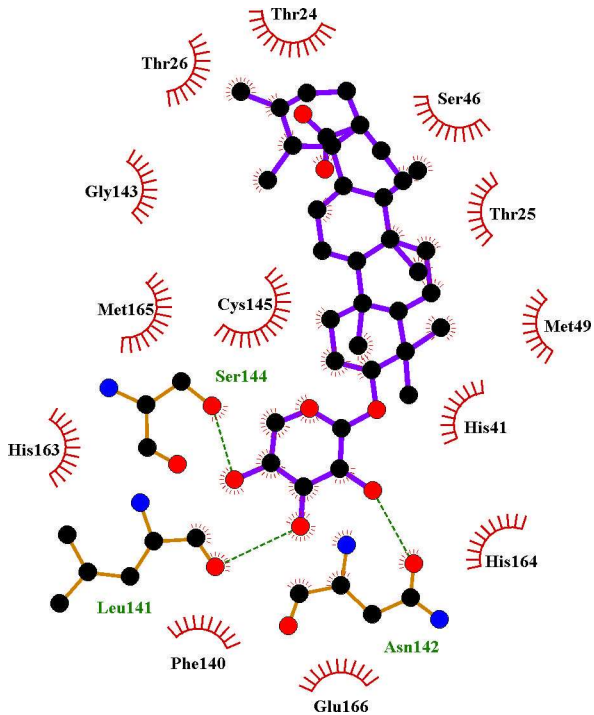

ZINC000095619992

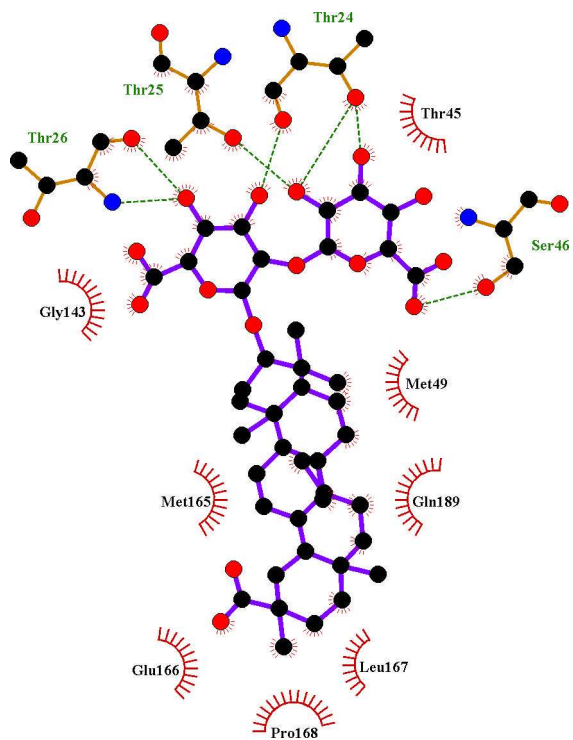

ZINC000118937488

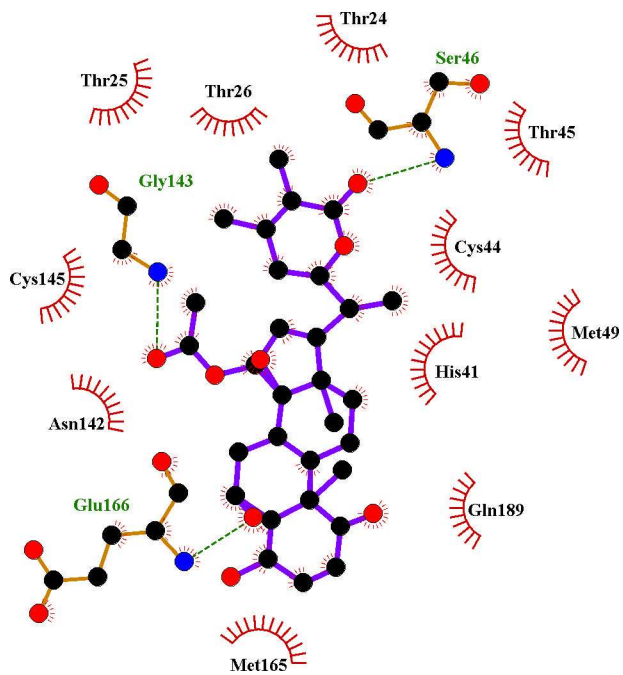



ZINC000100783660

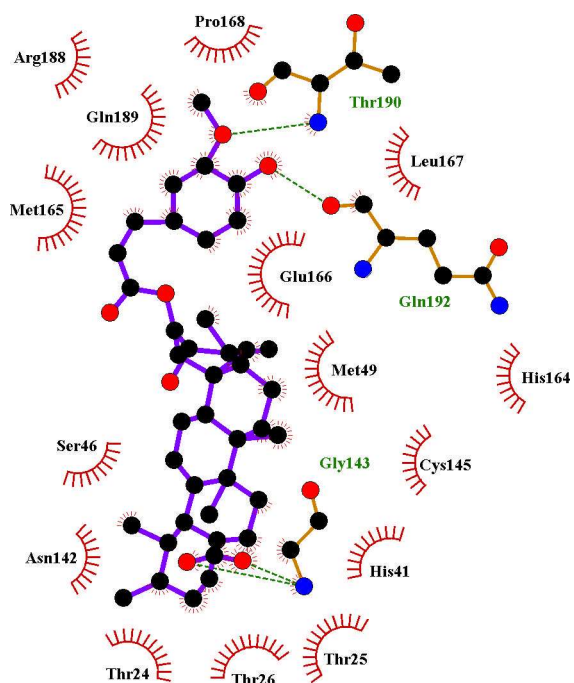

ZINC000100777487

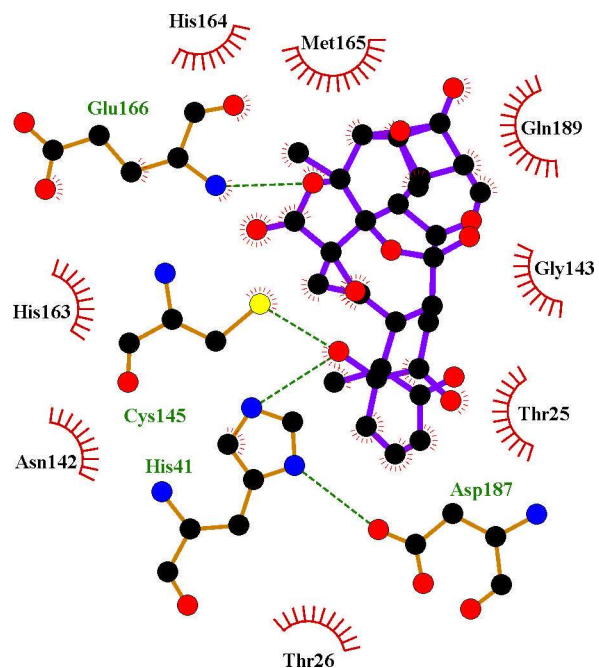

ZINC000004879678

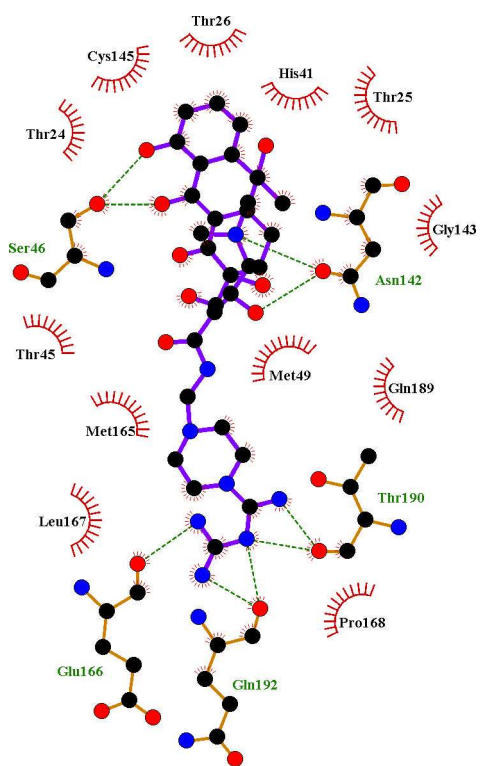

ZINC000150354128

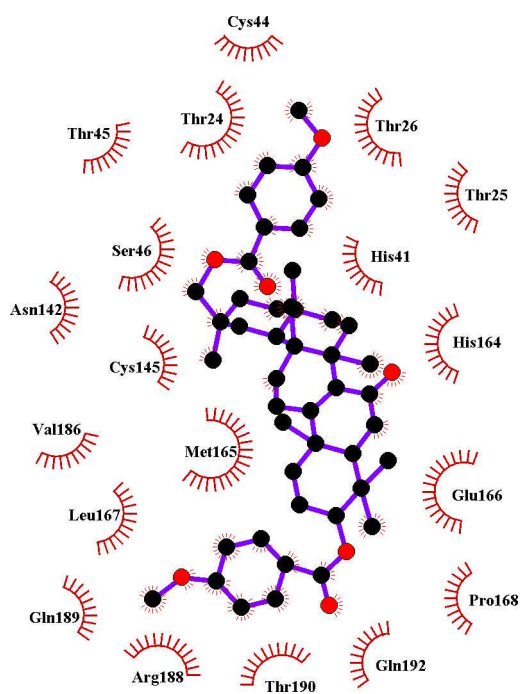

ZINC000004215464

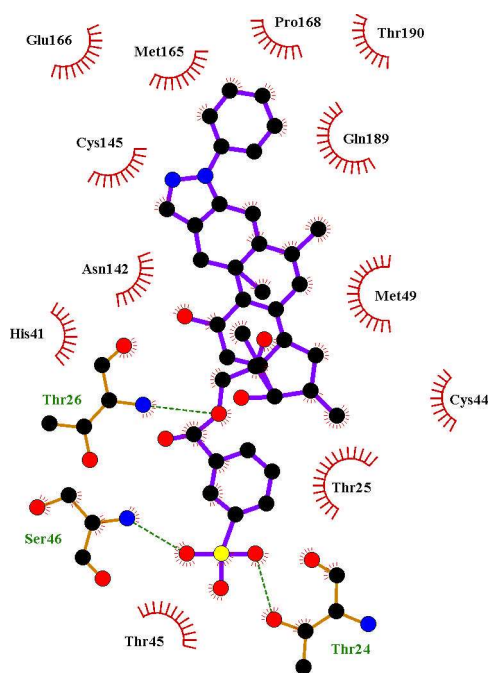

ZINC000100774273

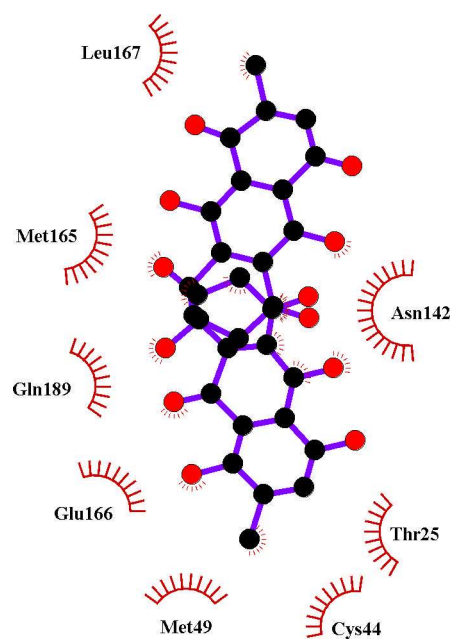

ZINC000073224787

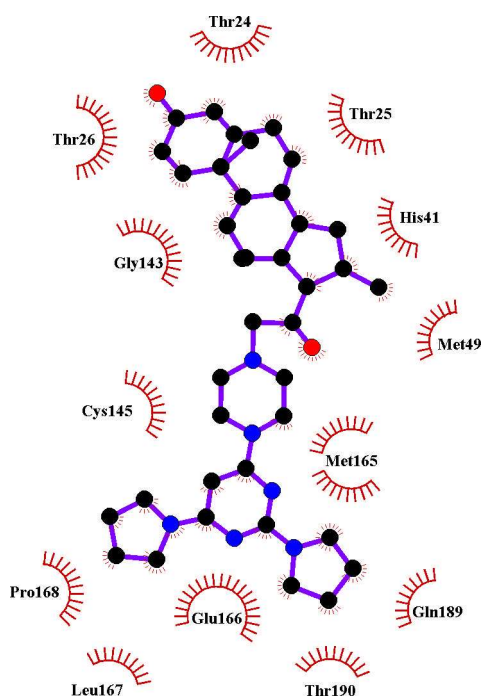

ZINC000253599724

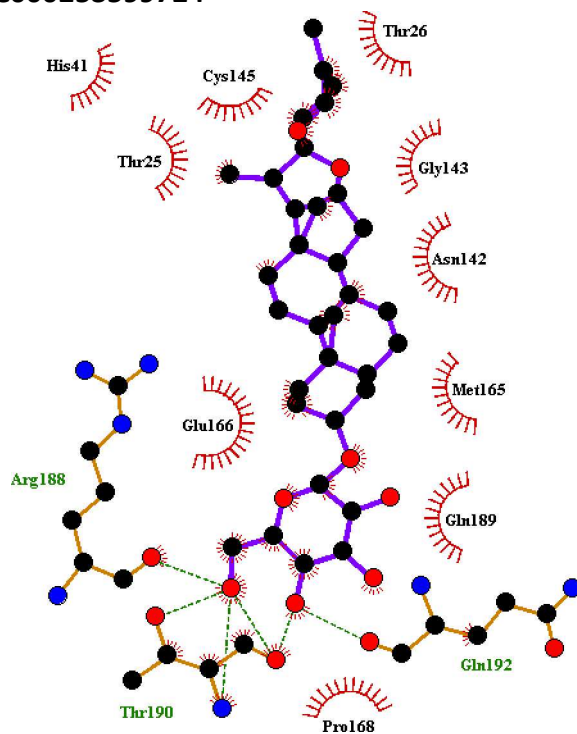

ZINC000100774275

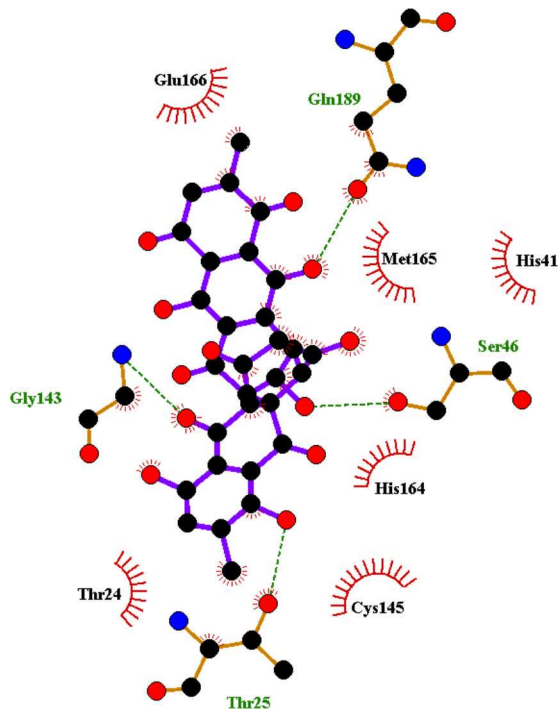

ZINC000004215844

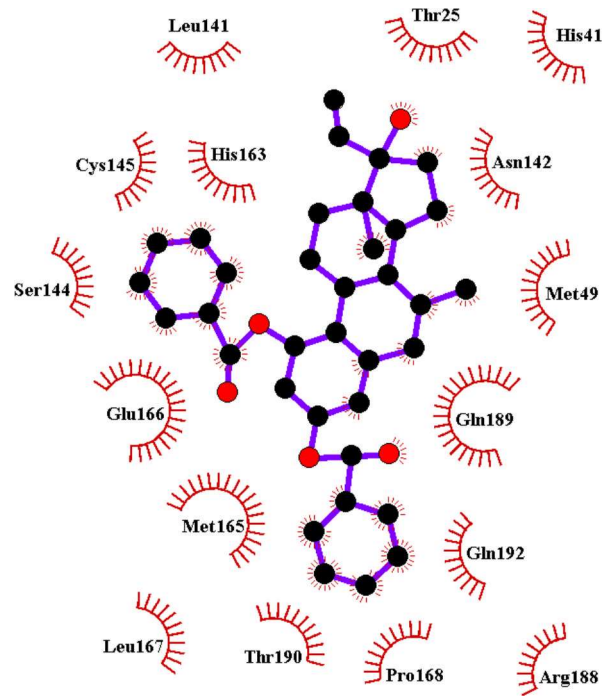

ZINC000085537129

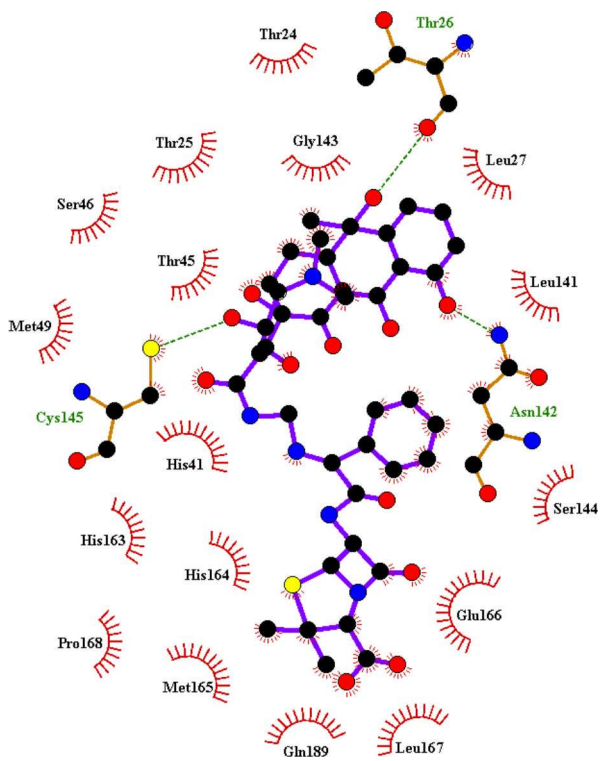

ZINC000100774279

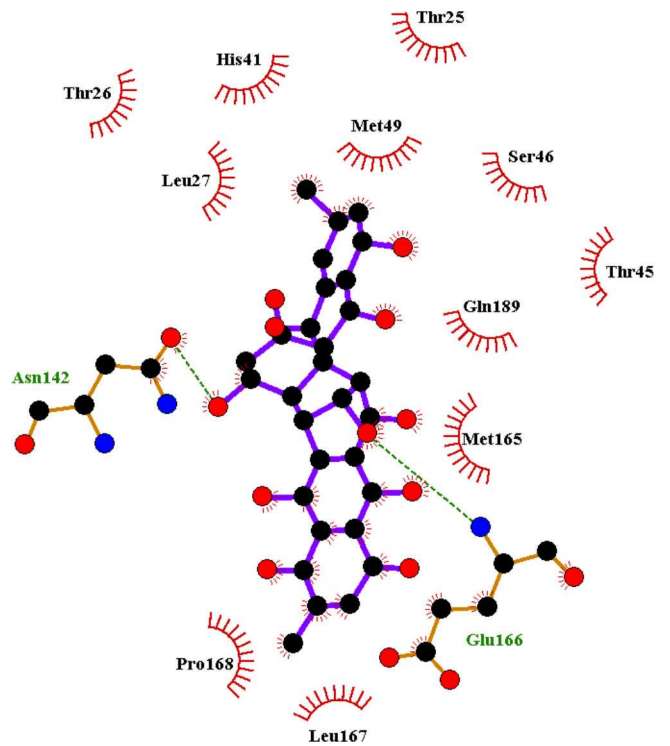



ZINC000100772783

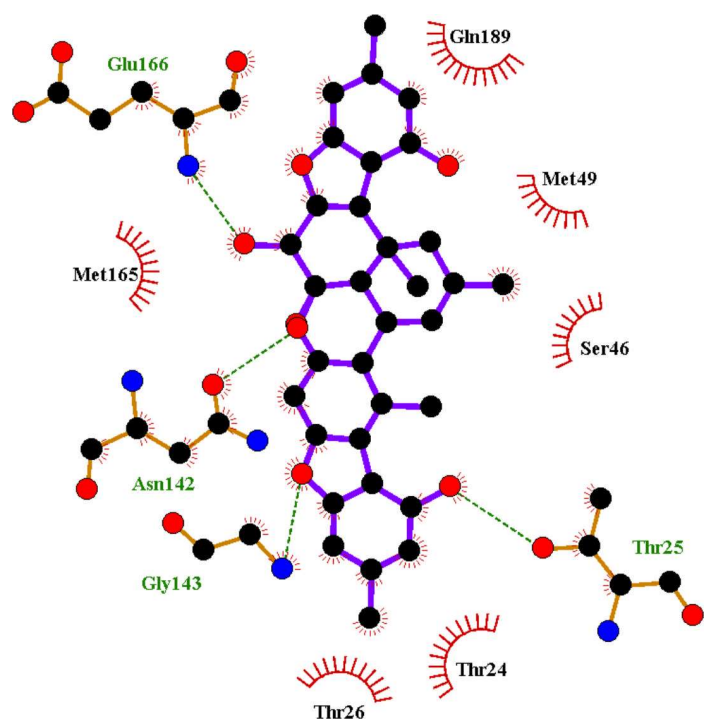

ZINC000100826921

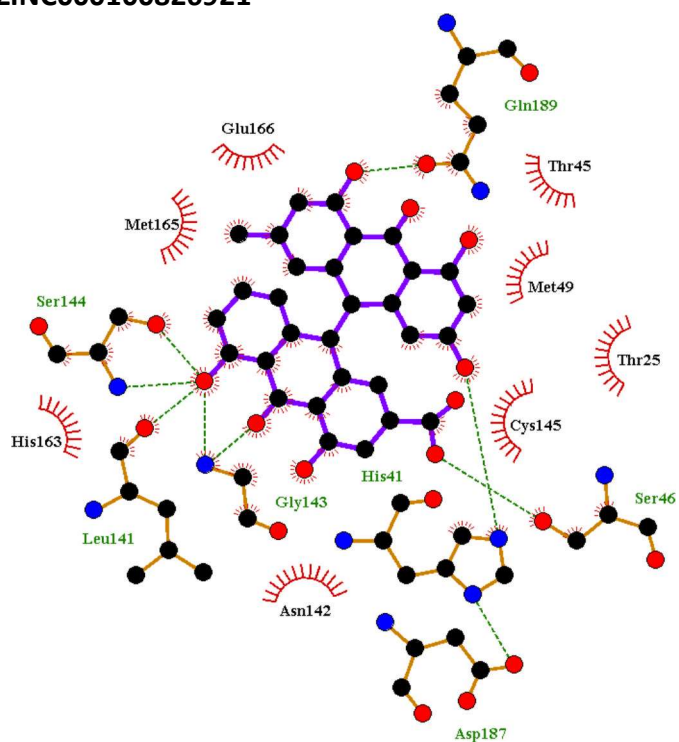

ZINC000051951668

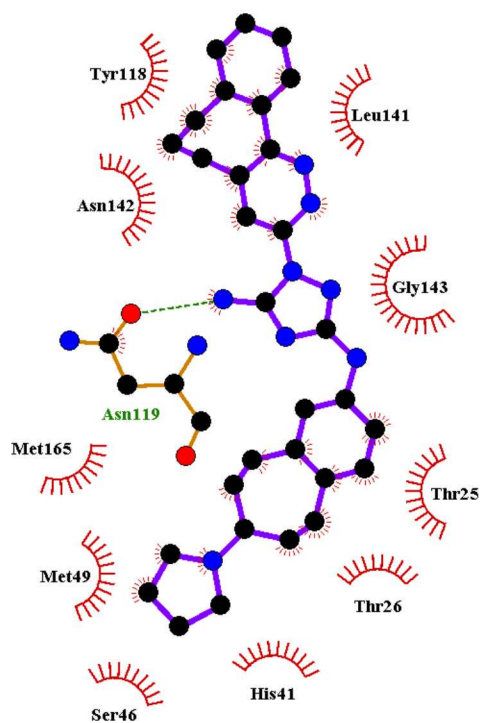

ZINC000100822646

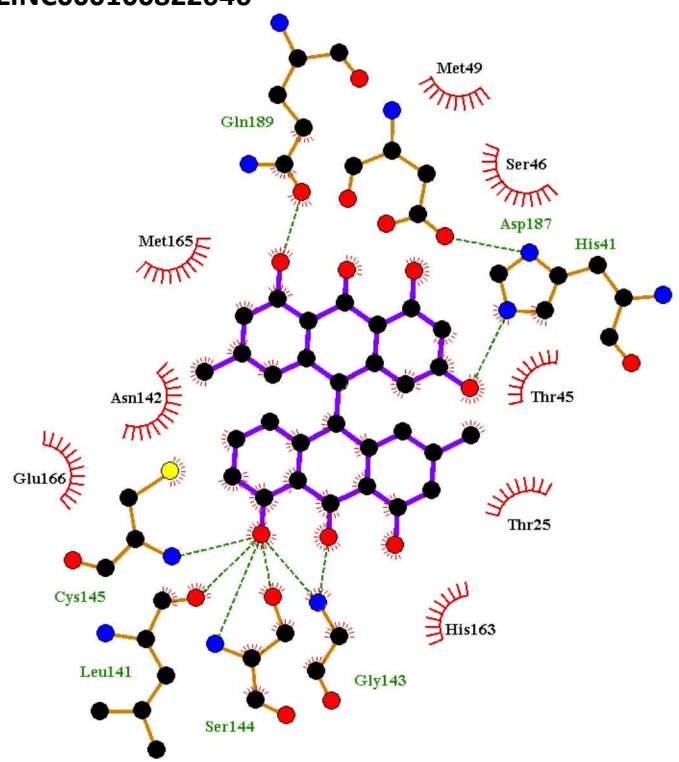

ZINC000004214742

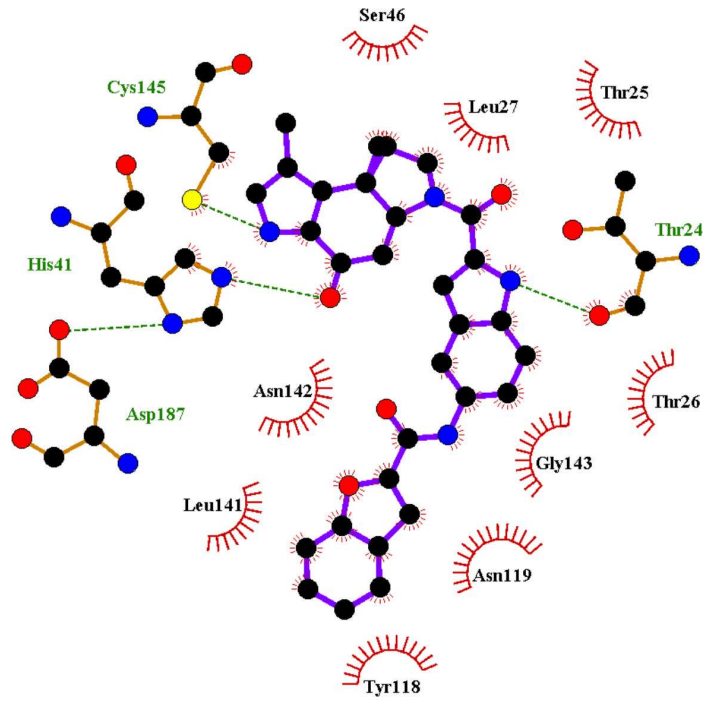

ZINC000239329011

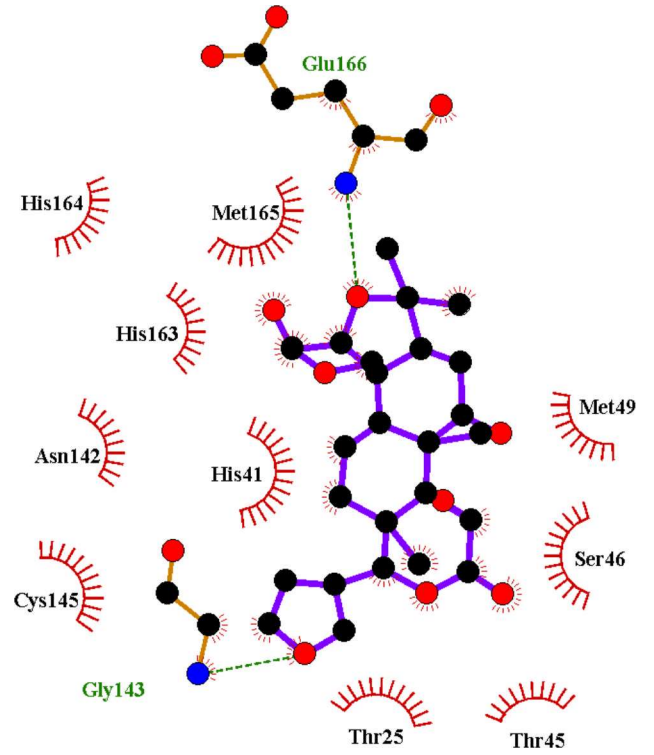

ZINC000118937393

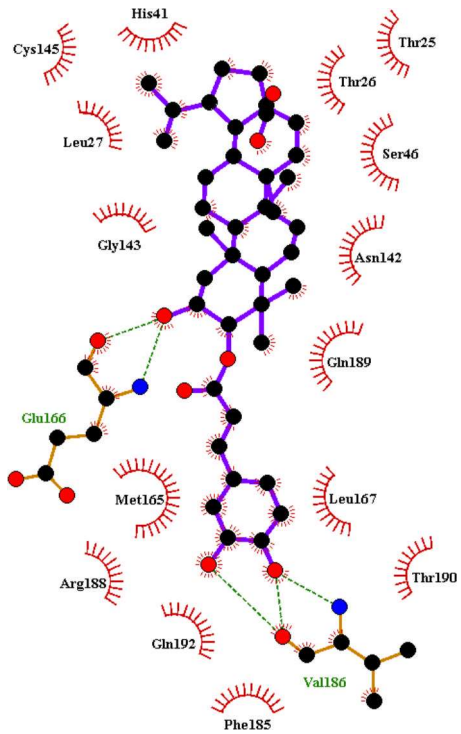

ZINC000103941727

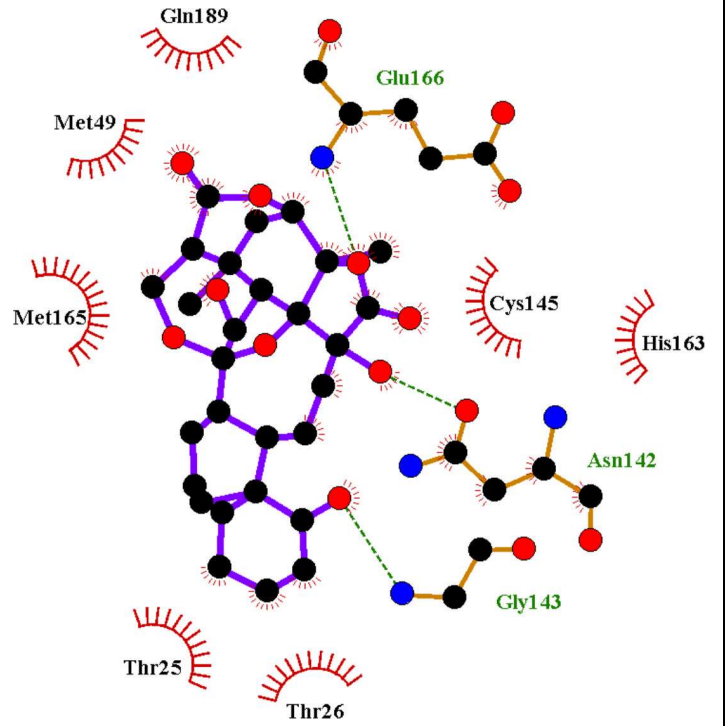

ZINC000043061730

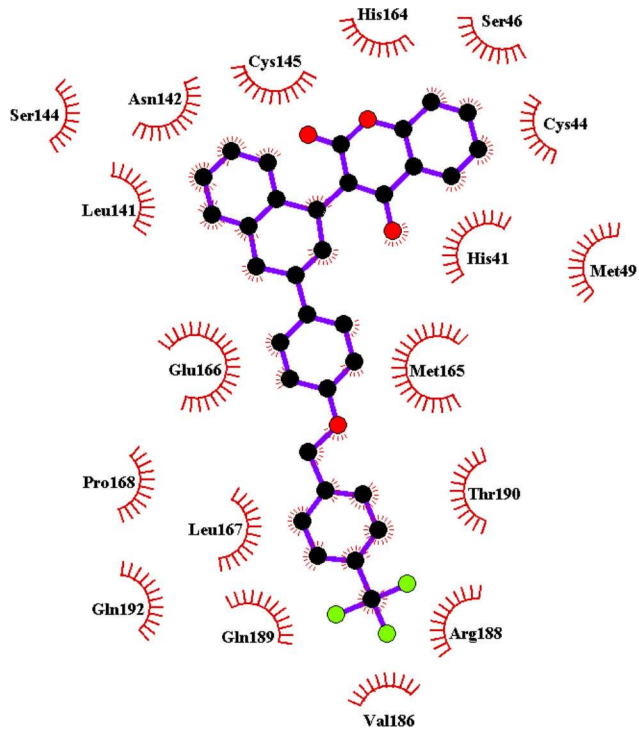

ZINC000256421903

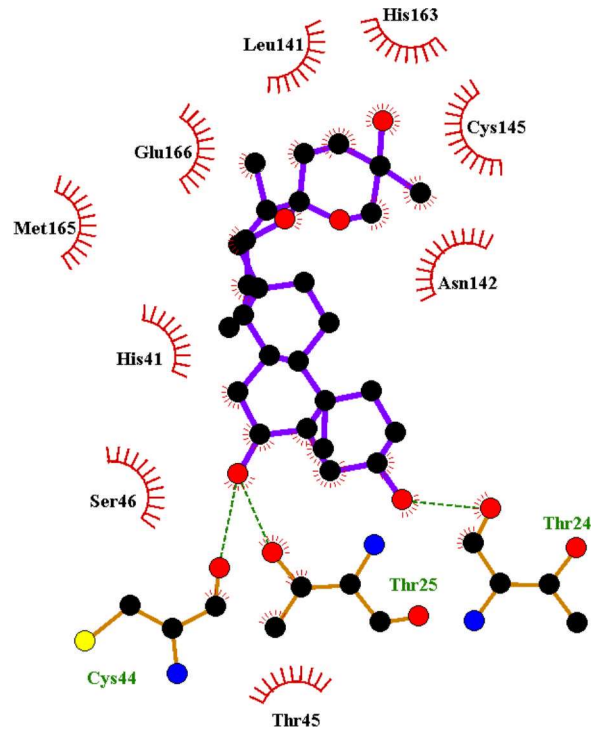

ZINC000150353464

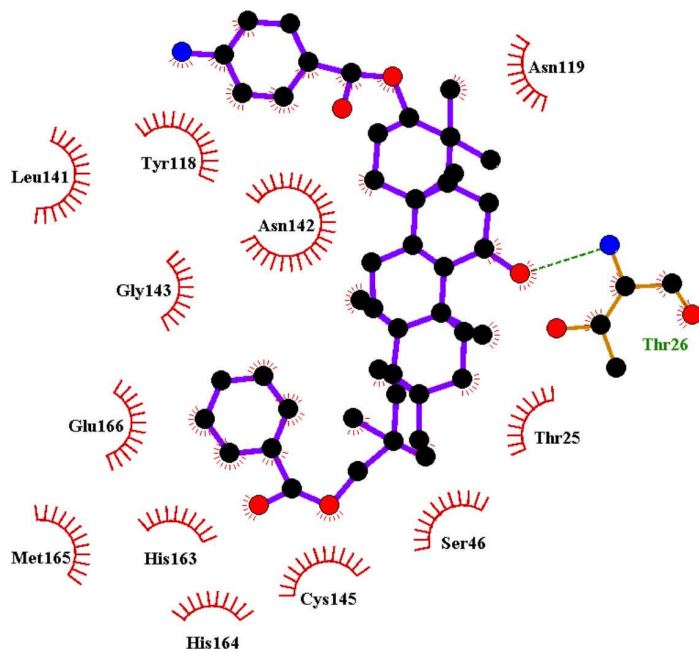

ZINC000253527861

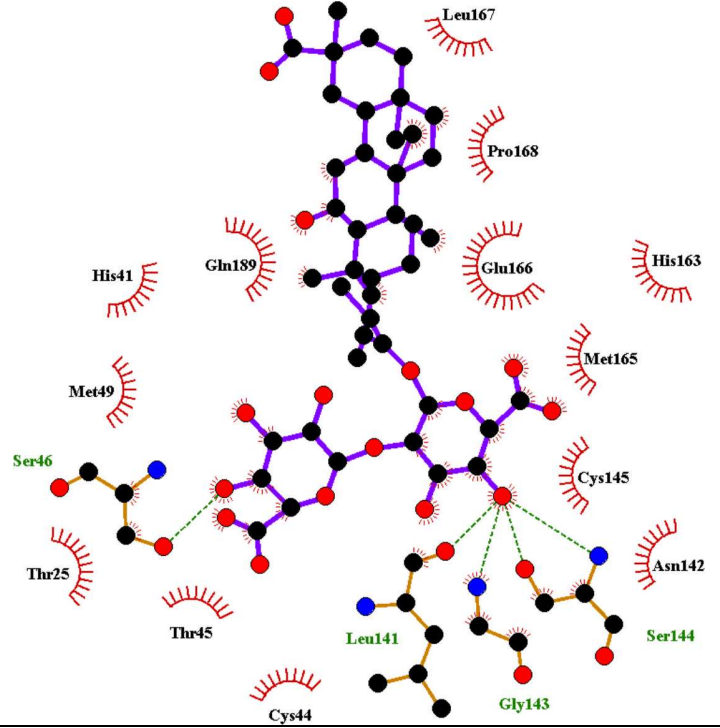

ZINC000100772795

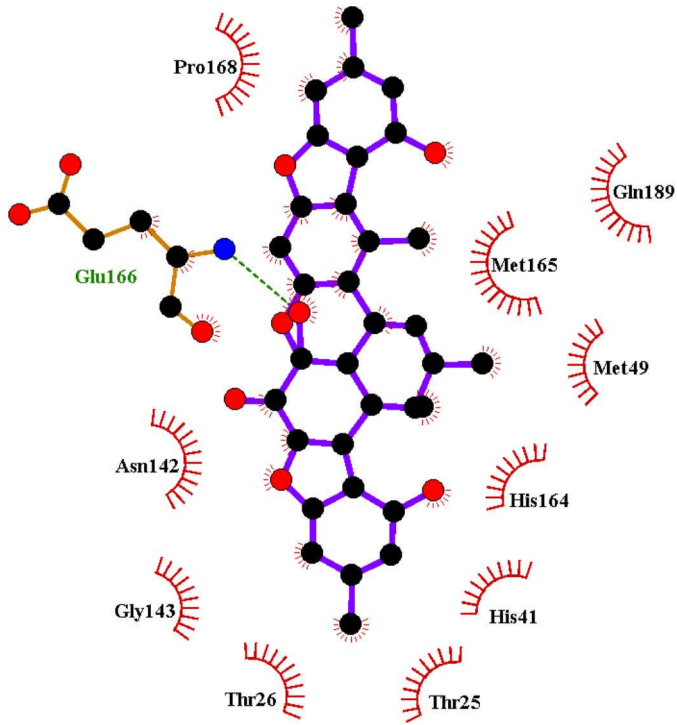

ZINC000095619883

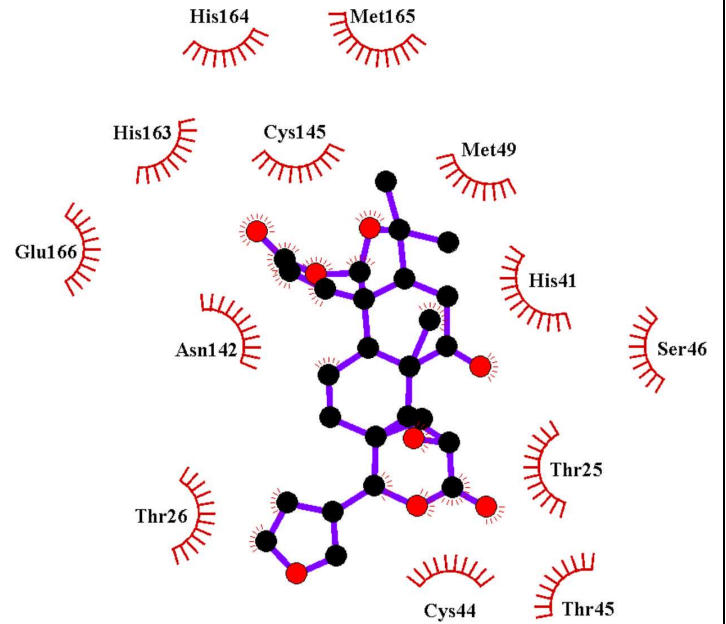

ZINC000100822774

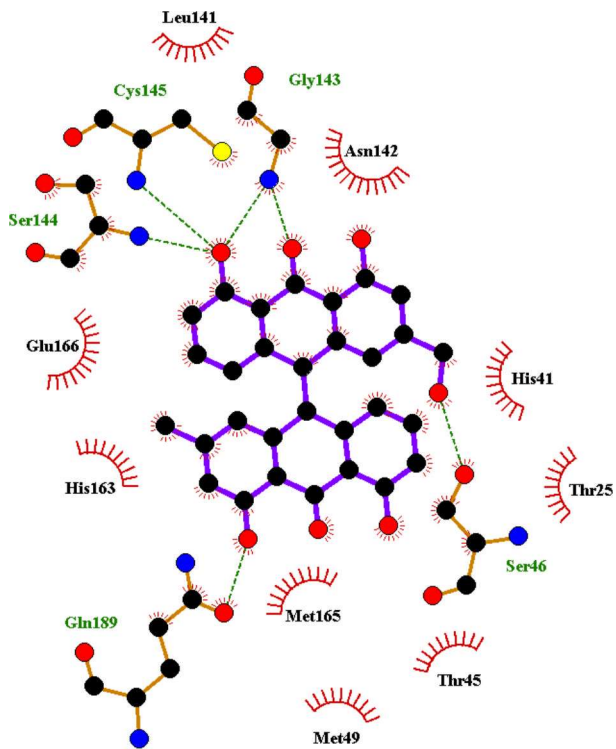

ZINC000100783375

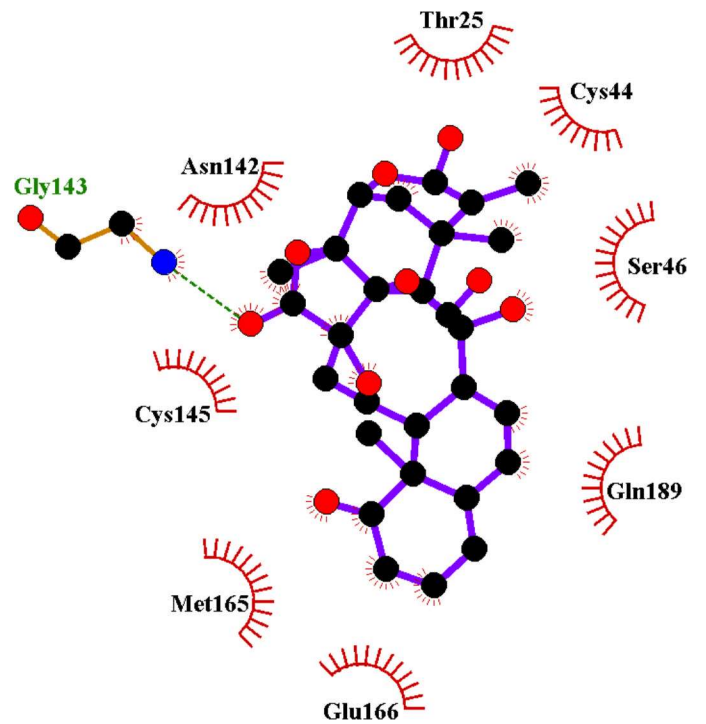



ZINC000100783373

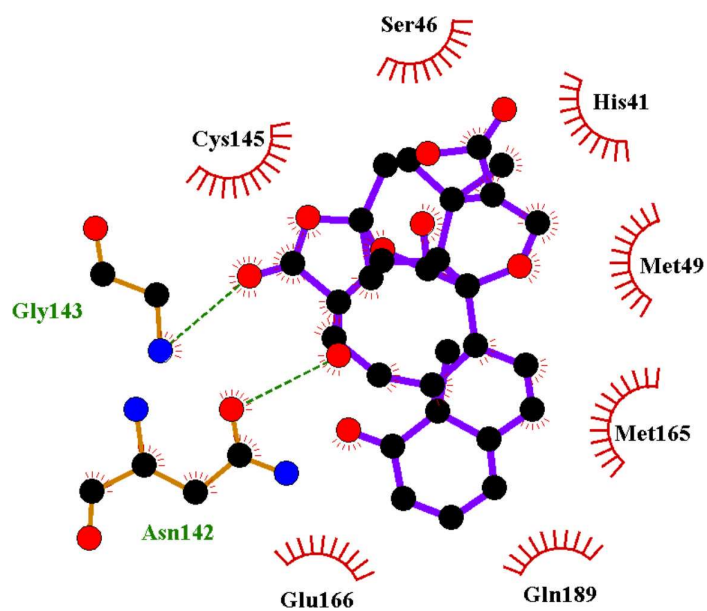

ZINC000261496785

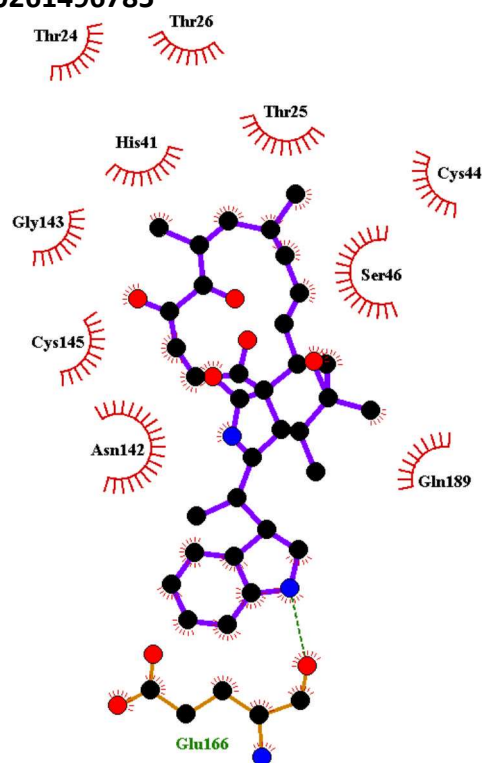

ZINC000100826926

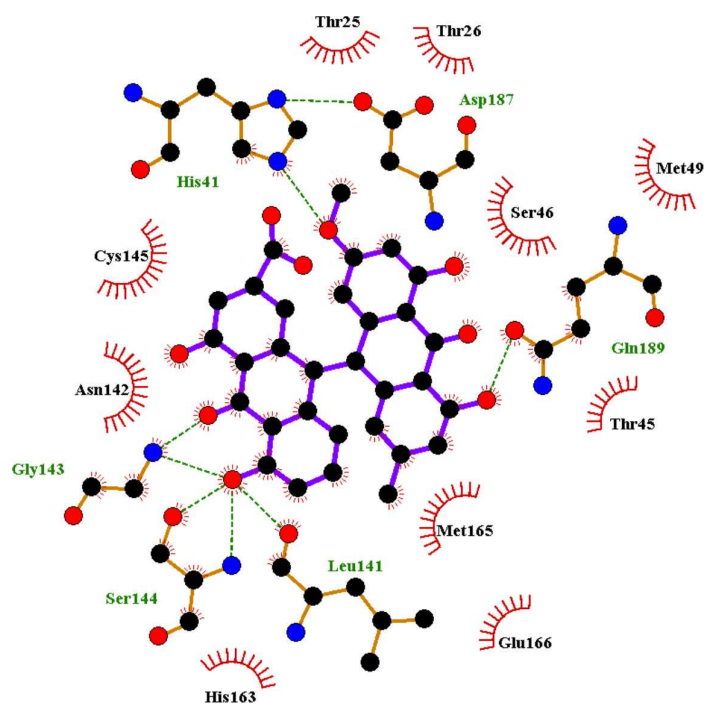

ZINC000100777456

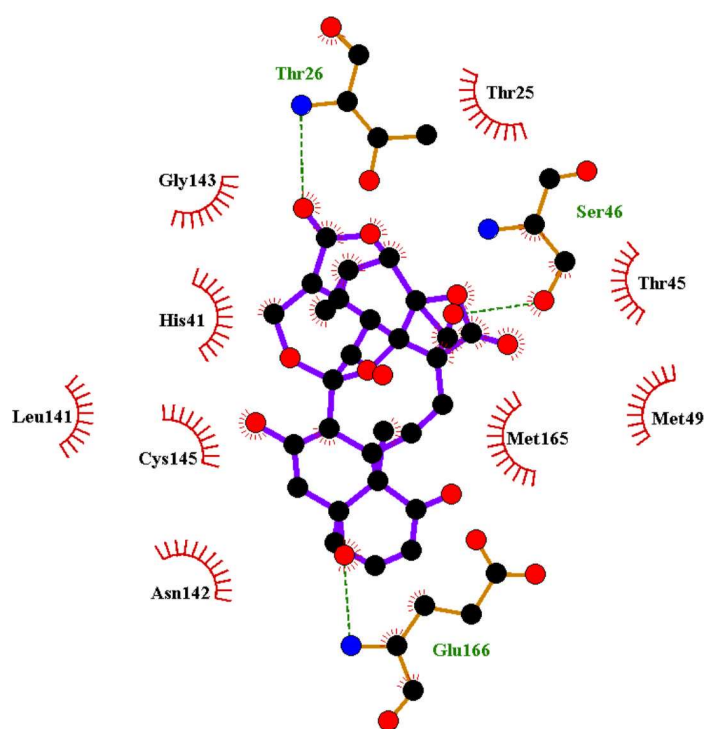

ZINC000100779057

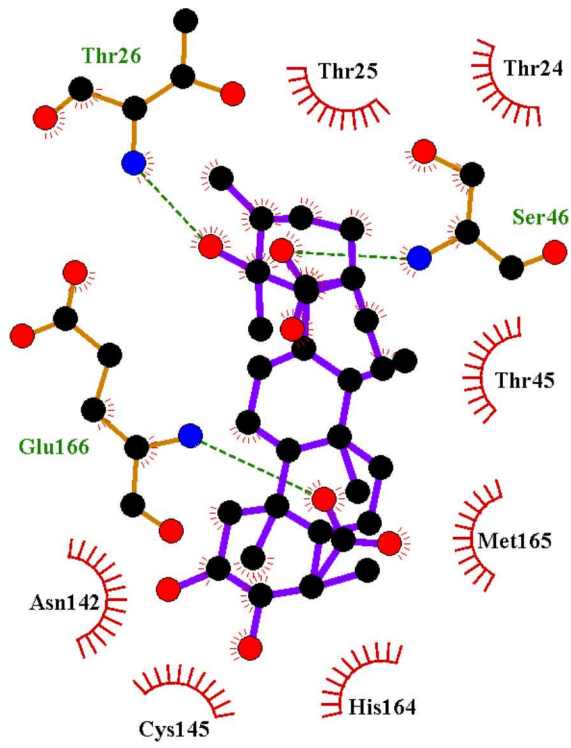

ZINC000118937472

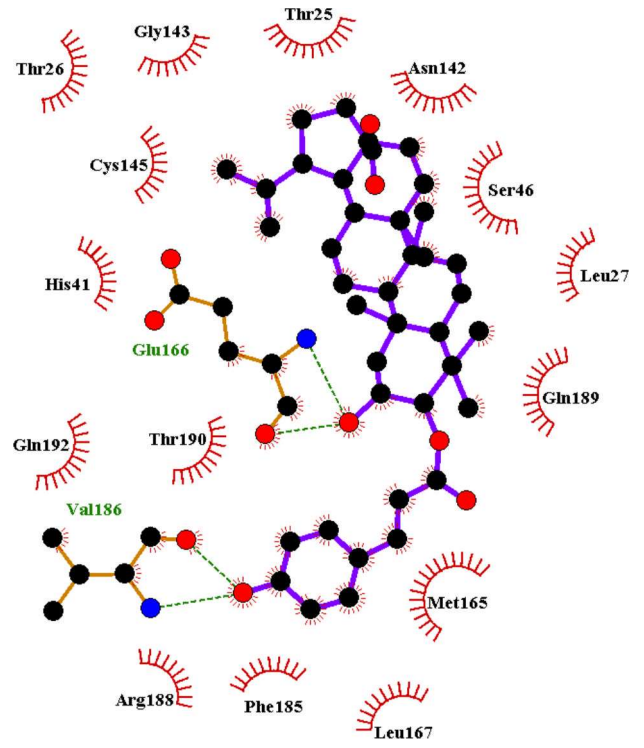

ZINC000100783384

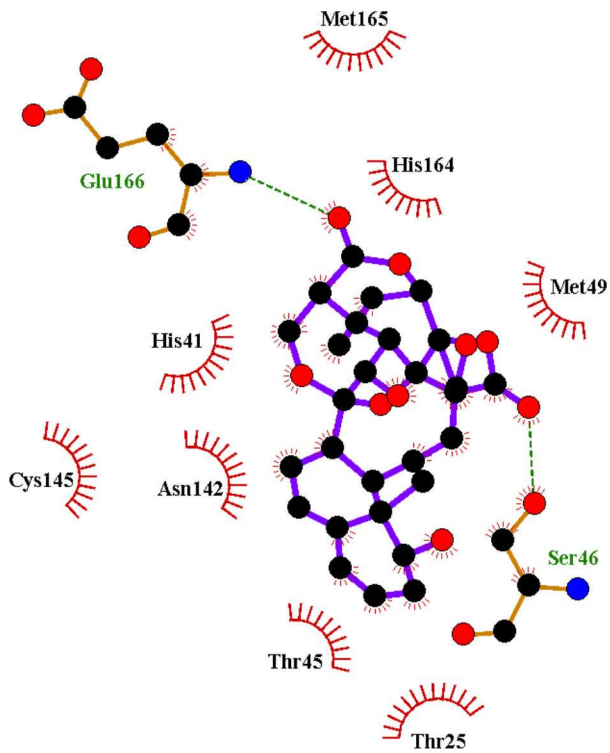

ZINC000100777392

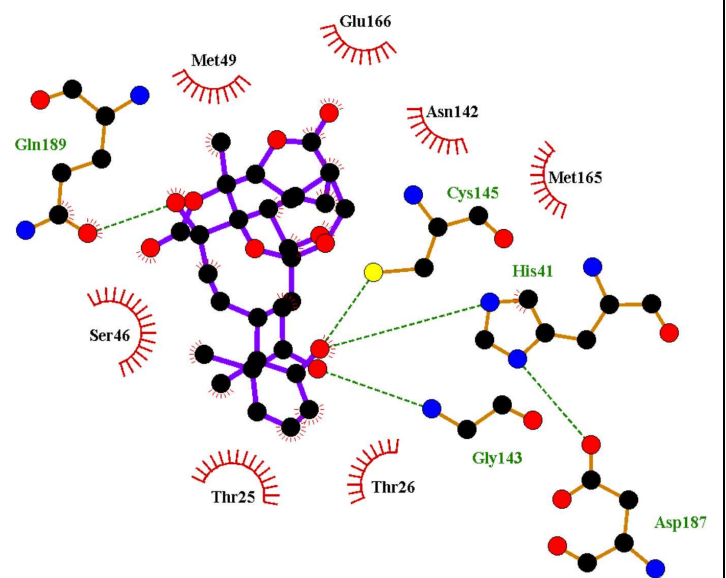



ZINC000100826931

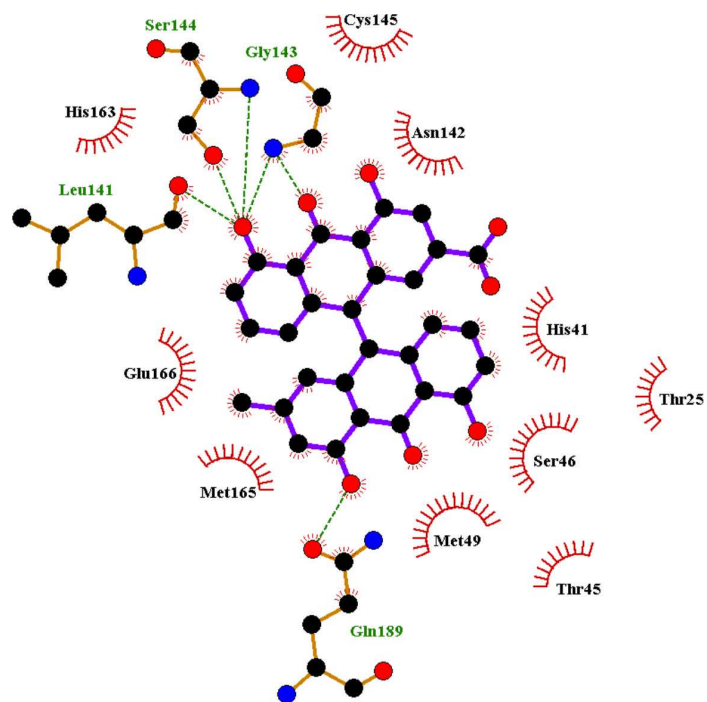

ZINC000072267001

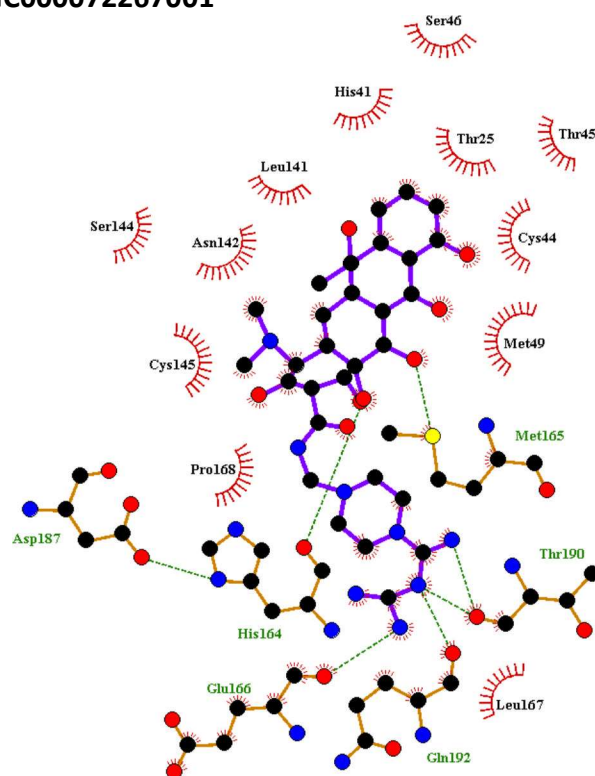

ZINC000100777664

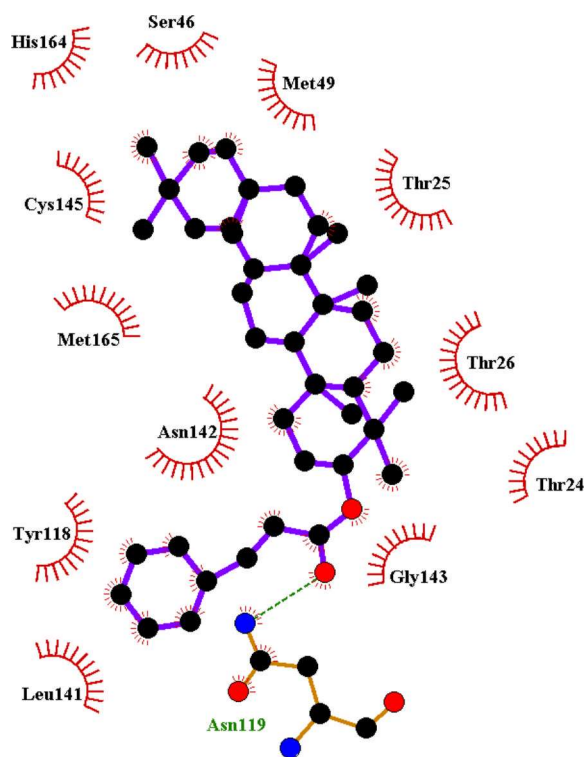

ZINC000085974153

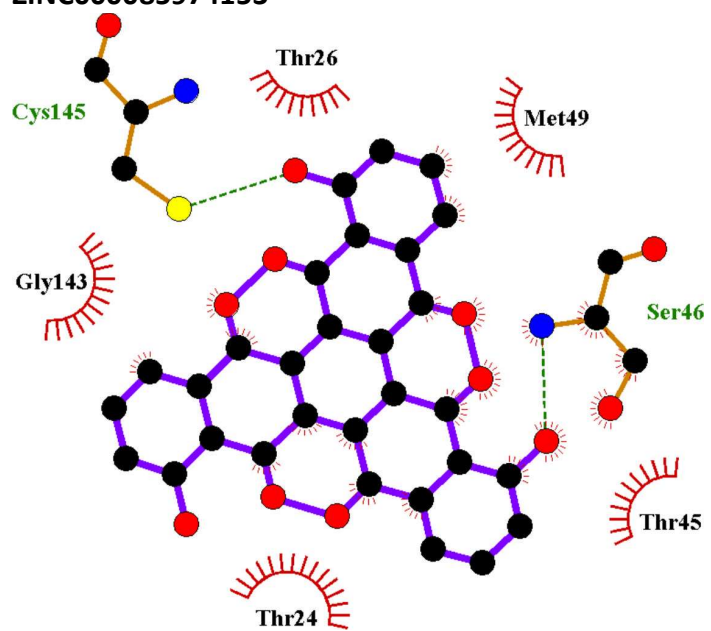

**Table S3.** The obtained values of the molecular docking and FPL simulations.

| N <sup>o</sup> | ZINC ID          | Name                                          | $\Delta G_{\text{Dock}}^a$ | $F_{\text{Max}}^b$ | $W^c$      | $\Delta G_{\text{FPL}}^{\text{Pre d}}$ |
|----------------|------------------|-----------------------------------------------|----------------------------|--------------------|------------|----------------------------------------|
| 1              | ZINC000253599724 | Asparagoside A                                | -8.9                       | 534.1 ± 41.0       | 61.9 ± 3.8 | -8.96                                  |
| 2              | ZINC000100774275 | Rubroskyrin                                   | -9.0                       | 579.1 ± 30.2       | 60.9 ± 3.5 | -8.91                                  |
| 3              | ZINC000004215844 | Etamestrol                                    | -9.0                       | 560.6 ± 39.0       | 59.5 ± 4.3 | -8.83                                  |
| 4              | ZINC000085537129 | Penimocycline                                 | -8.9                       | 569.8 ± 25.6       | 58.0 ± 3.1 | -8.75                                  |
| 5              | ZINC000100774279 | Deoxyrubroskyrin                              | -9.2                       | 582.1 ± 32.9       | 57.7 ± 5.6 | -8.73                                  |
| 6              | ZINC000100777465 | Physalin G                                    | -9.2                       | 637.5 ± 43.4       | 57.6 ± 4.2 | -8.72                                  |
| 7              | ZINC000113198271 | Altiratinib                                   | -8.9                       | 533.4 ± 25.1       | 57.2 ± 3.3 | -8.70                                  |
| 8              | ZINC000085488845 | Bisodiospyrin                                 | -9.6                       | 559.1 ± 38.9       | 56.9 ± 4.2 | -8.69                                  |
| 9              | ZINC000095564635 | Afoxolaner                                    | -8.9                       | 485.8 ± 29.1       | 56.8 ± 4.0 | -8.68                                  |
| 10             | ZINC000100772783 | Asticolorin A                                 | -9.3                       | 596.3 ± 33.8       | 56.7 ± 2.5 | -8.68                                  |
| 11             | ZINC000100826921 | Rheidin A                                     | -9.8                       | 608.3 ± 24.5       | 55.1 ± 1.9 | -8.59                                  |
| 12             | ZINC000051951668 | R428                                          | -9.0                       | 550.1 ± 28.3       | 54.9 ± 2.4 | -8.57                                  |
| 13             | ZINC000100822646 | Palmidin C                                    | -9.9                       | 604.0 ± 24.7       | 54.0 ± 2.5 | -8.53                                  |
| 14             | ZINC000004214742 | Undefined                                     | -9.1                       | 512.6 ± 23.5       | 53.9 ± 3.2 | -8.52                                  |
| 15             | ZINC000239329011 | Limonin                                       | -9.1                       | 610.3 ± 41.0       | 53.3 ± 2.5 | -8.49                                  |
| 16             | ZINC000118937393 | 2alpha-Hydroxypyraacrenic acid                | -9.0                       | 446.6 ± 31.0       | 53.3 ± 5.3 | -8.48                                  |
| 17             | ZINC000103941727 | Physalin B                                    | -9.0                       | 578.8 ± 19.5       | 53.1 ± 1.8 | -8.47                                  |
| 18             | ZINC000043061730 | Flocoumafen                                   | -9.0                       | 550.8 ± 14.7       | 53.0 ± 2.4 | -8.47                                  |
| 19             | ZINC000256421903 | Asperagenin                                   | -9.0                       | 589.6 ± 43.0       | 52.2 ± 3.0 | -8.42                                  |
| 20             | ZINC000150353464 | 7-Epizucchini Factor A                        | -9.1                       | 561.3 ± 43.5       | 52 ± 4.2   | -8.41                                  |
| 21             | ZINC000253527861 | Glycyrrhizin                                  | -8.9                       | 513.4 ± 47.2       | 52 ± 6.2   | -8.41                                  |
| 22             | ZINC000100772795 | Asticolorin B                                 | -8.9                       | 570.4 ± 37.7       | 51.6 ± 3.3 | -8.39                                  |
| 23             | ZINC000095619883 | Jangomolide                                   | -9.2                       | 590.7 ± 30.5       | 51.2 ± 2.7 | -8.37                                  |
| 24             | ZINC000100822774 | Palmidin B                                    | -9.2                       | 567.3 ± 30.7       | 50.9 ± 2.5 | -8.35                                  |
| 25             | ZINC000100783375 | 25,27-Dihydro-4,7-didehydro-7-deoxyphysalin A | -9.1                       | 571.5 ± 18.1       | 50.5 ± 1.7 | -8.33                                  |
| 26             | ZINC000100783373 | 4,7-Didehydroneophysalin B                    | -9.7                       | 591.2 ± 54.3       | 50.4 ± 6.8 | -8.32                                  |

|    |                  |                                       |      |              |            |       |
|----|------------------|---------------------------------------|------|--------------|------------|-------|
| 27 | ZINC000261496785 | Chaetoglobosin N                      | -9.2 | 549 ± 29.9   | 49.6 ± 2.1 | -8.28 |
| 28 | ZINC000100826926 | Rheidin C                             | -9.9 | 568.6 ± 42.4 | 48.8 ± 4.1 | -8.23 |
| 29 | ZINC000100777456 | Physalin E                            | -9.2 | 487.4 ± 42.0 | 46.4 ± 3.8 | -8.1  |
| 30 | ZINC000100779057 | Corosin                               | -8.9 | 502.3 ± 32.9 | 45.5 ± 2.7 | -8.05 |
| 31 | ZINC000118937472 | 3-O-p-trans-Coumaroylalphitollic acid | -9.0 | 449.3 ± 22.7 | 45.5 ± 2.8 | -8.05 |
| 32 | ZINC000100783384 | Isophysalin B                         | -9.0 | 509.3 ± 24.4 | 44.5 ± 2.8 | -7.99 |
| 33 | ZINC000100777392 | Physalin H                            | -9.2 | 467.4 ± 14.5 | 44.2 ± 1.9 | -7.98 |
| 34 | ZINC000100782938 | Physalin N                            | -9.4 | 499.6 ± 38.2 | 43.9 ± 3.9 | -7.96 |
| 35 | ZINC000150353094 | Zucchini Factor B                     | -9.3 | 411.8 ± 18.2 | 42.2 ± 1.7 | -7.87 |
| 36 | ZINC000100783281 | Physalin P                            | -9.1 | 482.8 ± 19.4 | 38.9 ± 2.5 | -7.84 |
| 37 | ZINC000070450821 | Sennidin C                            | -9.1 | 406.0 ± 18.0 | 38.1 ± 3.1 | -7.64 |
| 38 | ZINC000100826931 | Rheidin B                             | -9.7 | 450.9 ± 37.5 | 37.2 ± 4.4 | -7.58 |
| 39 | ZINC000072267001 | Guamecycline                          | -9.4 | 409.8 ± 41.9 | 36.7 ± 6.1 | -7.56 |
| 40 | ZINC000100777664 | Germanicol Cinnamate                  | -9.6 | 389.5 ± 20.9 | 34.5 ± 2.2 | -7.44 |
| 41 | ZINC000085974153 | Trisjuglone                           | -9.3 | 406.2 ± 16.0 | 32.9 ± 2.6 | -7.35 |

---

<sup>a</sup>The docking affinity was calculated using the Autodock Vina package. <sup>b</sup>The obtained value of the mean rupture force  $F_{\text{Max}}$  and <sup>c</sup>the recorded metric of the pulling work  $W$ . <sup>d</sup>The predicted binding free energy  $\Delta G_{\text{FPL}}^{\text{Pre}}$  was attained using Eq. (1). The computed error was the standard error of the average. The unit of energy and force are in kcal mol<sup>-1</sup> and pN, respectively.

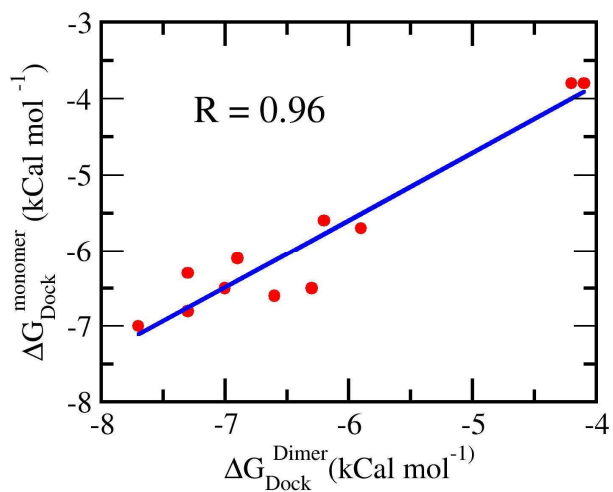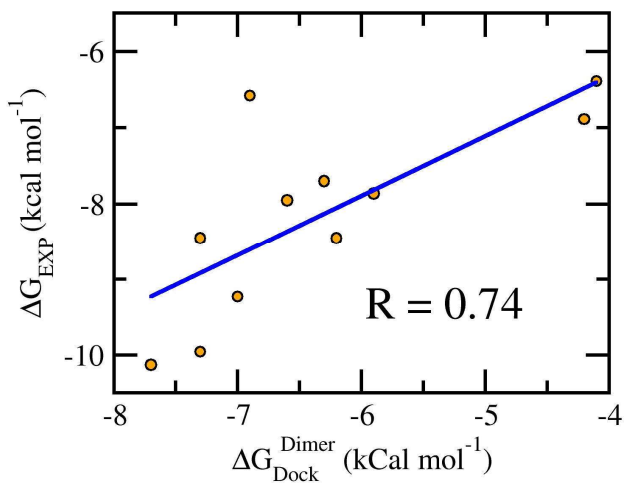

**Figure S1.** Association between the docking energy  $\Delta G_{\text{Dock}}^{\text{monomer}}$  versus  $\Delta G_{\text{Dock}}^{\text{Dimer}}$  (left) and  $\Delta G_{\text{Dock}}^{\text{Dimer}}$  versus  $\Delta G_{\text{EXP}}$  (right).

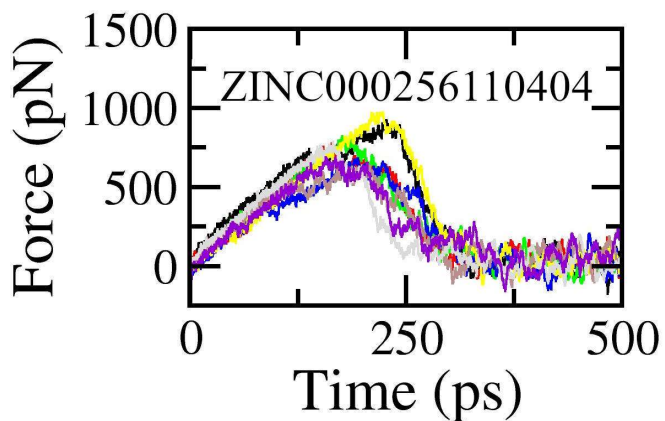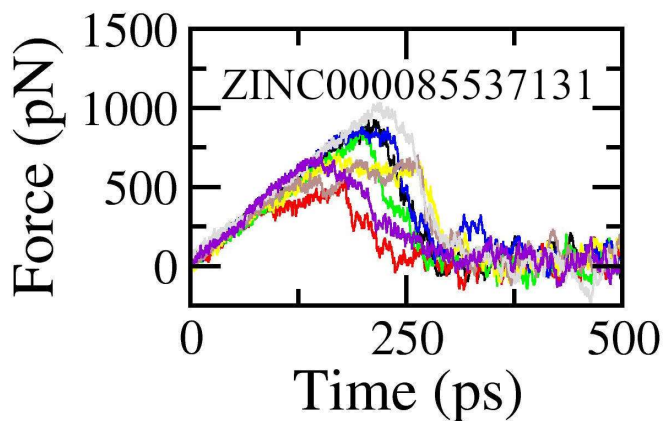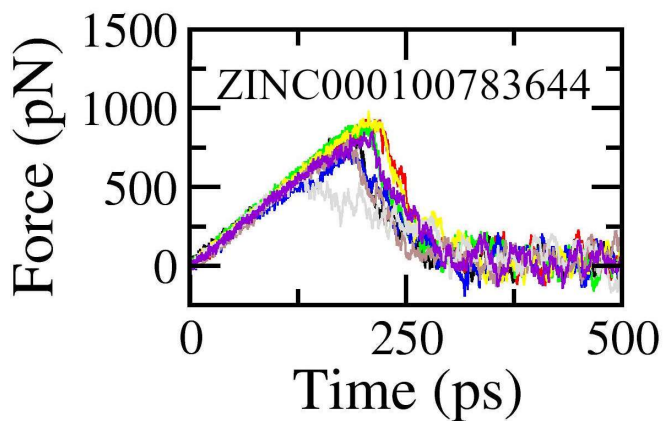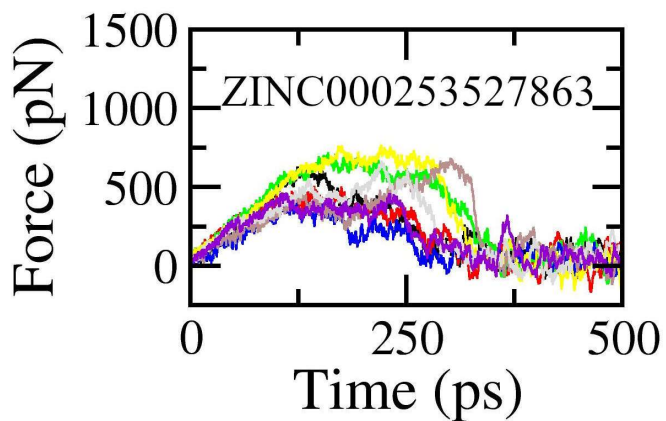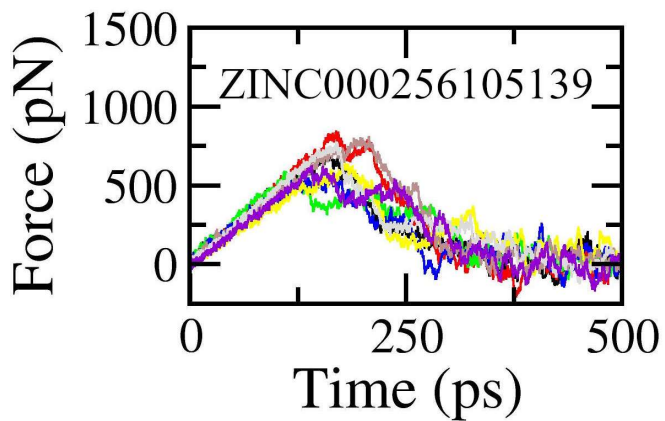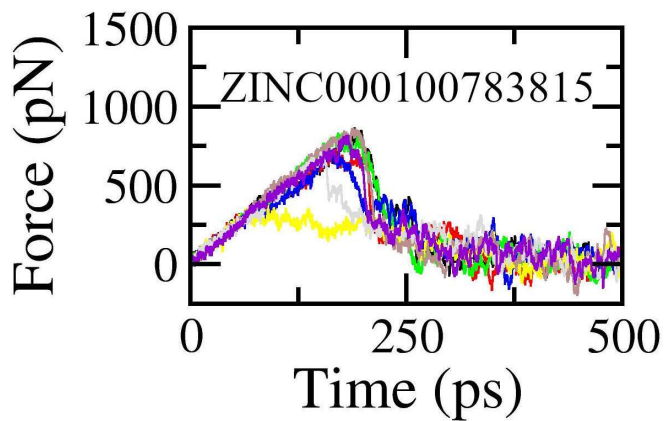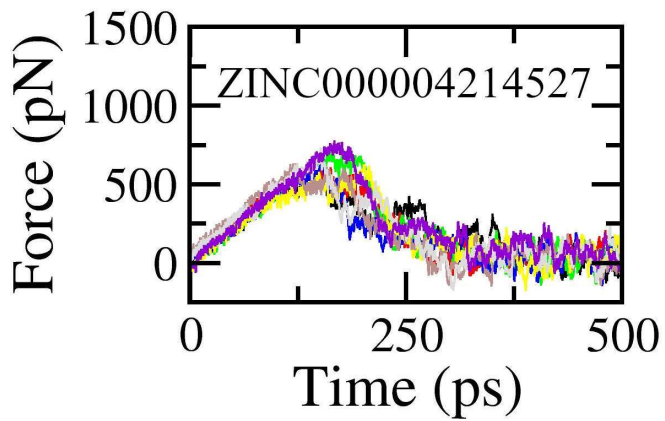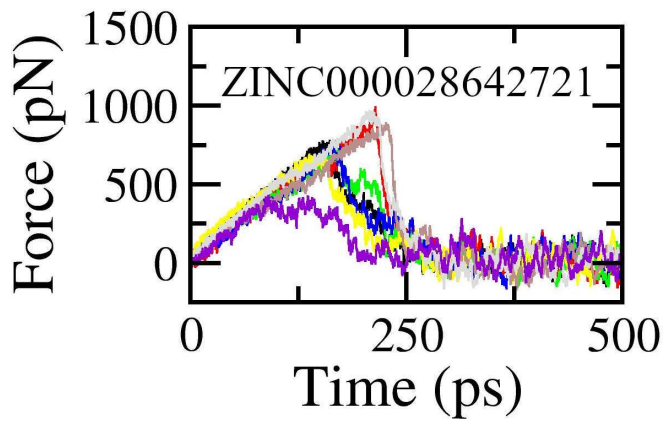



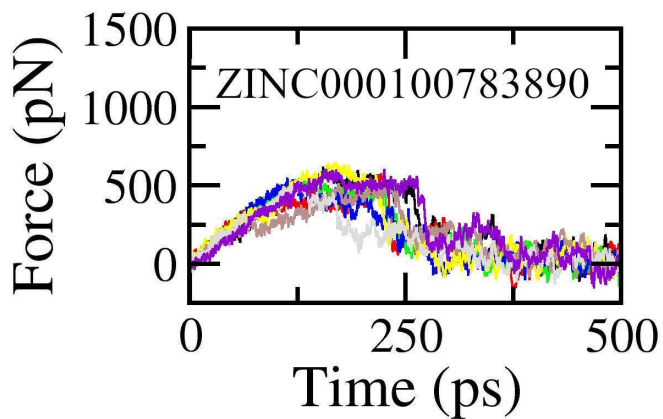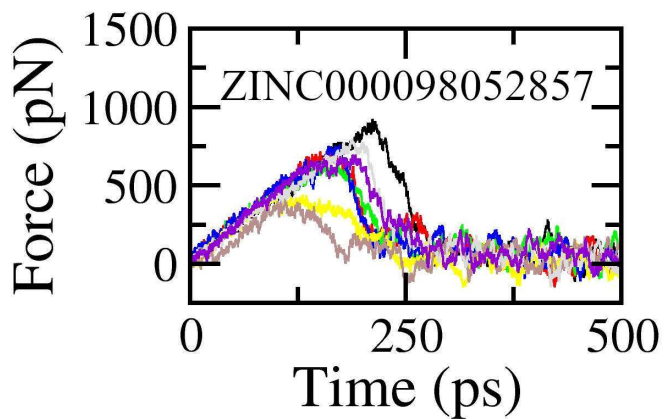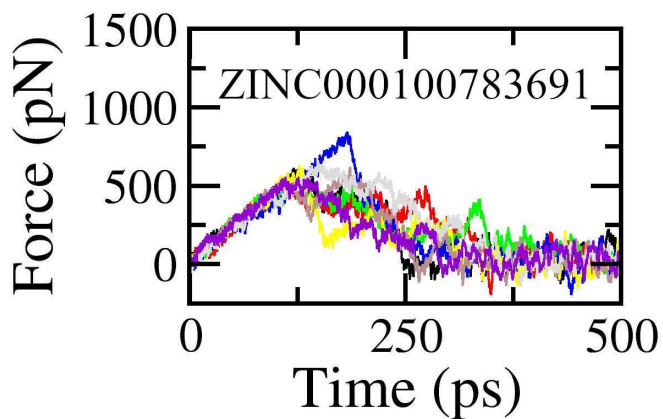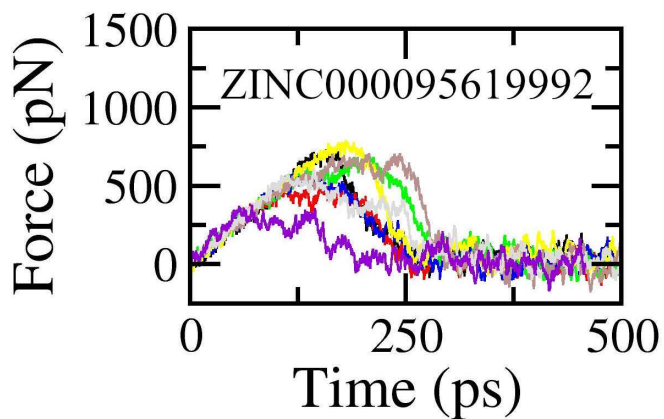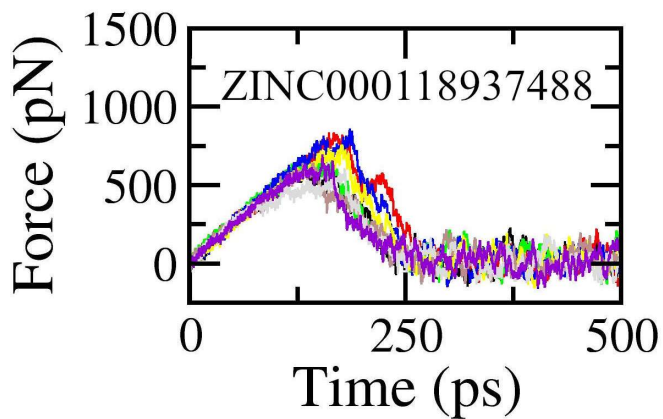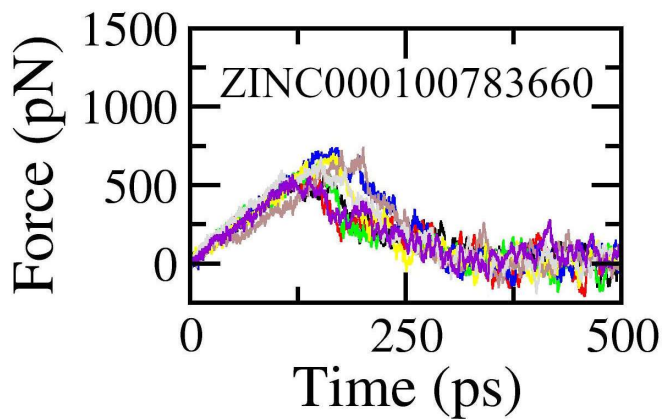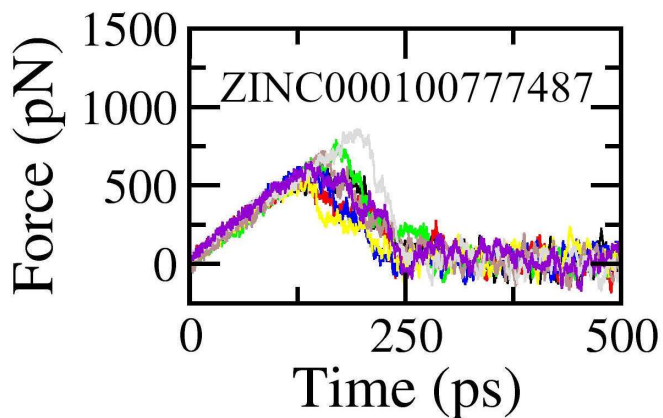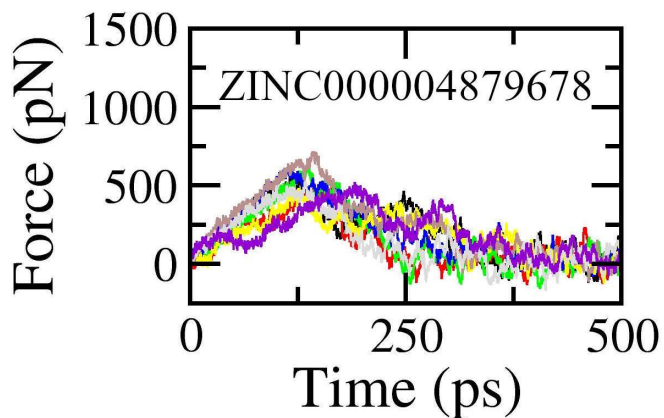

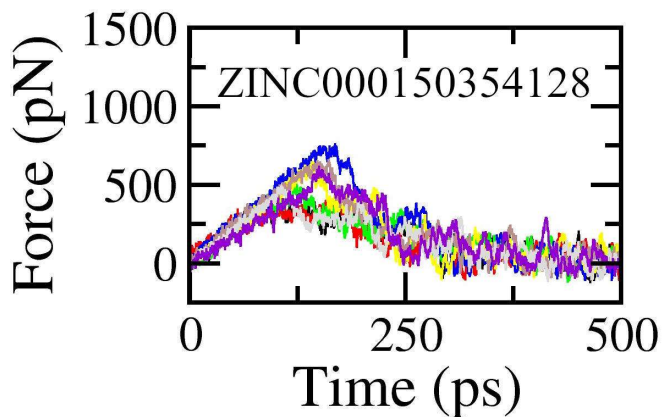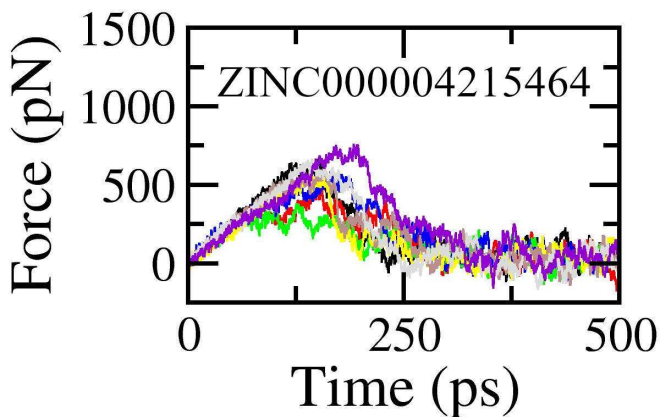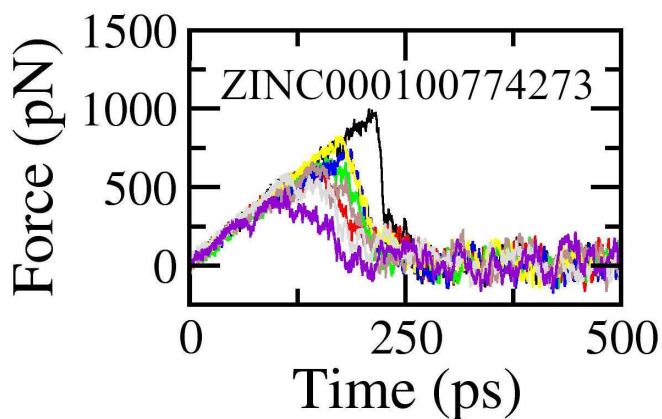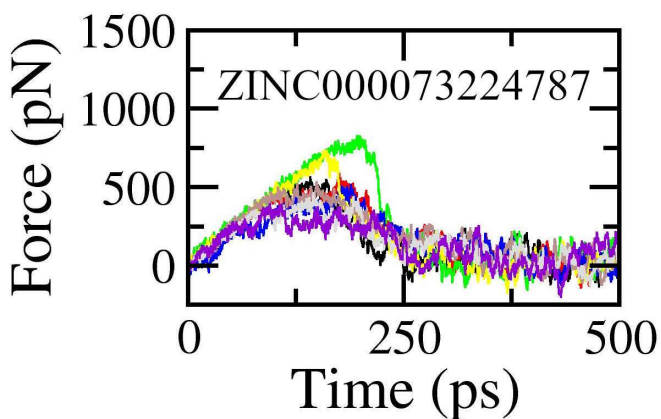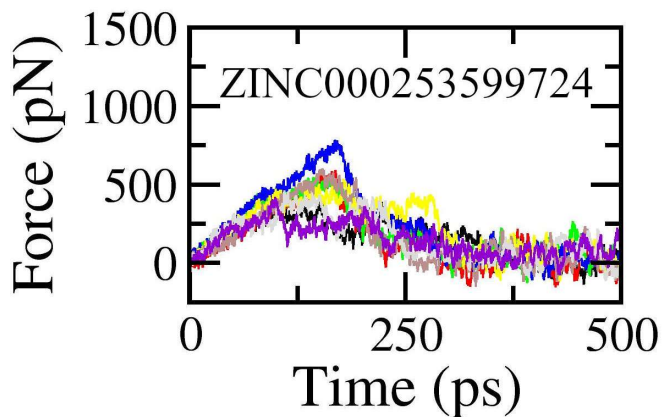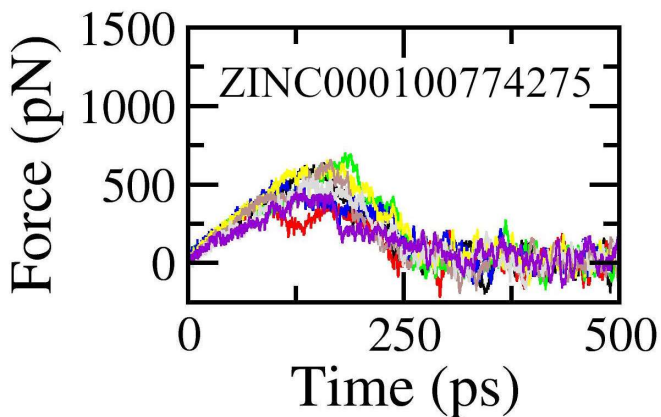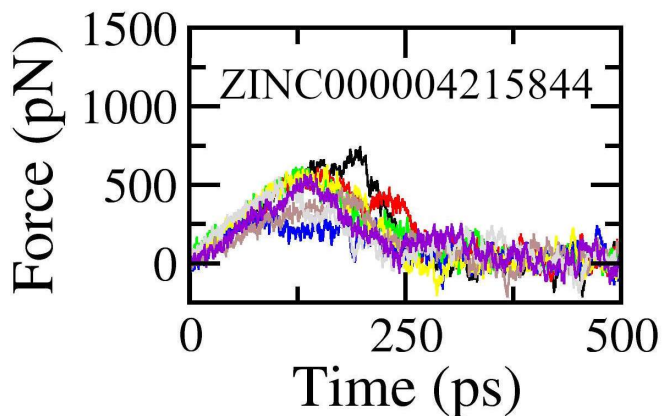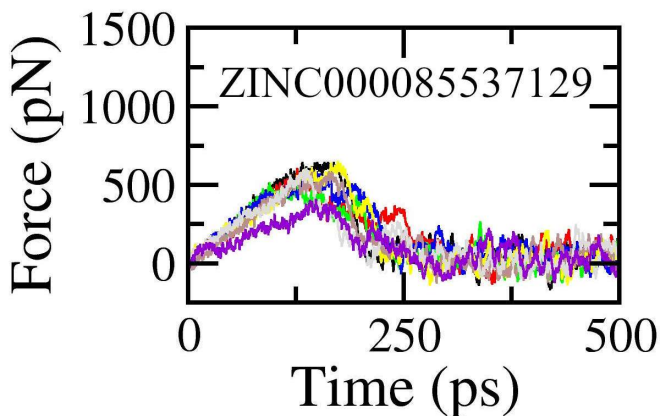

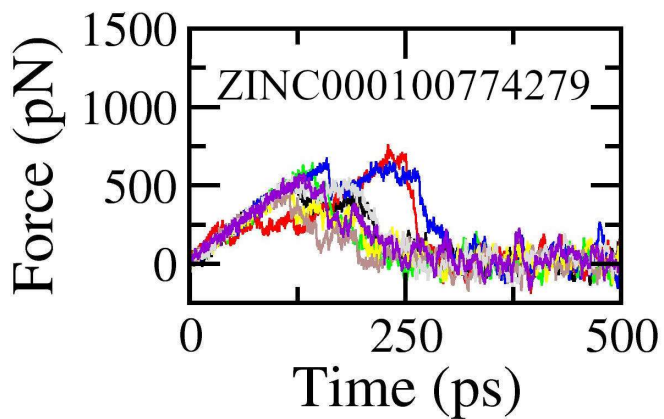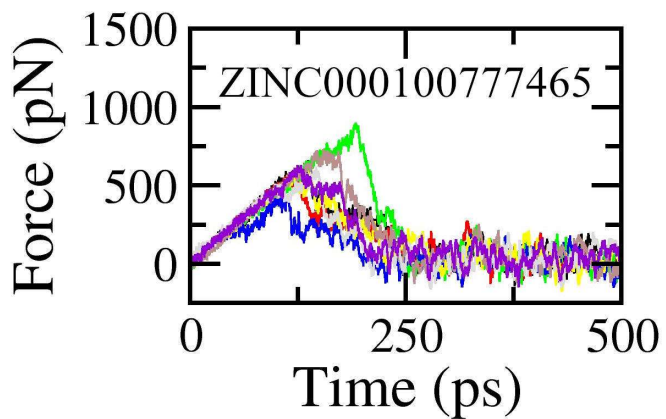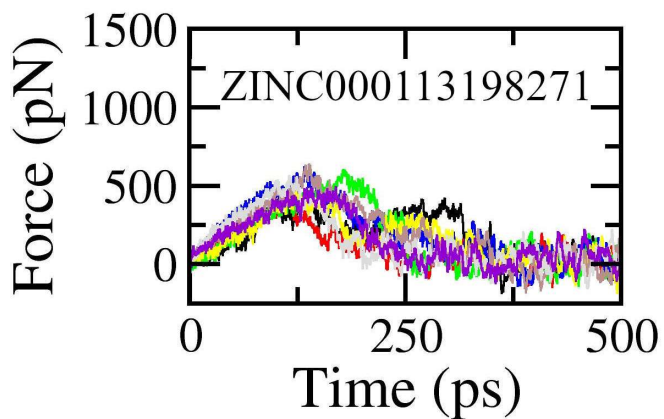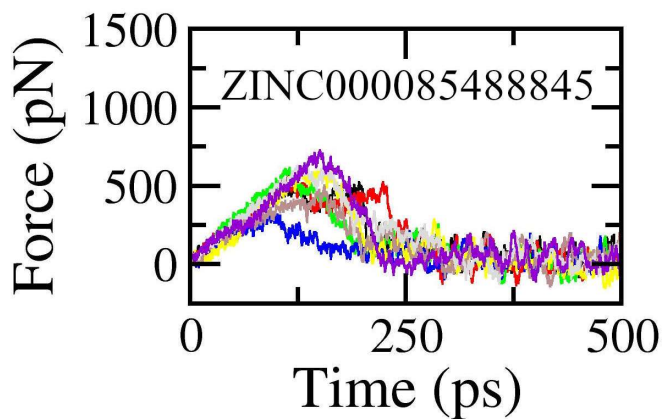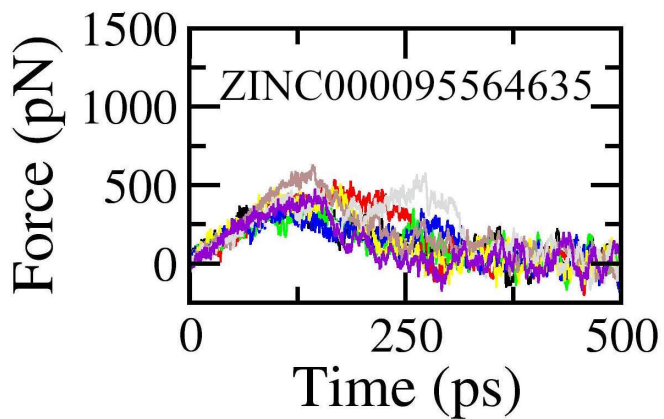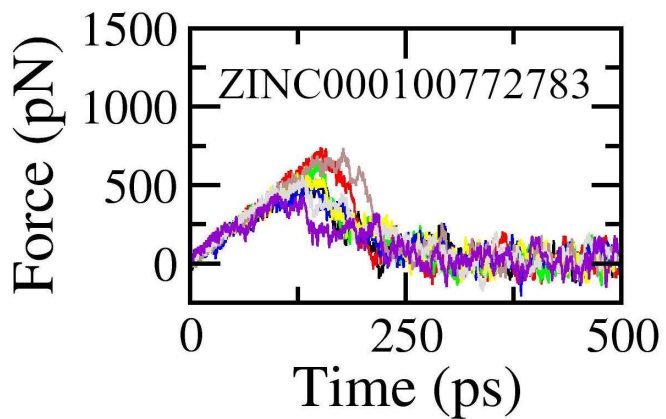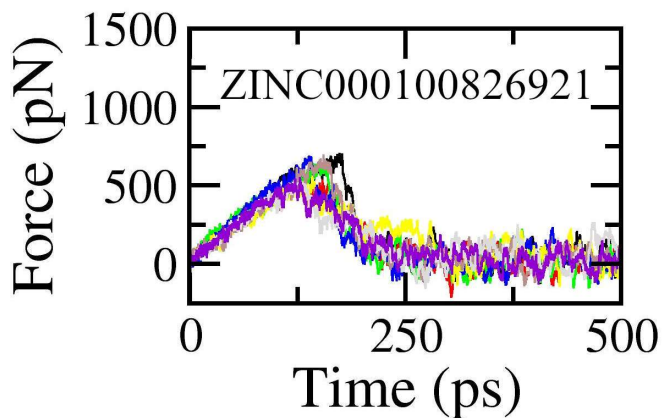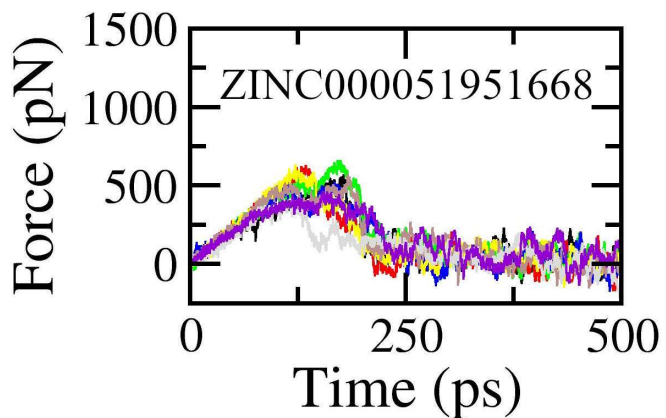

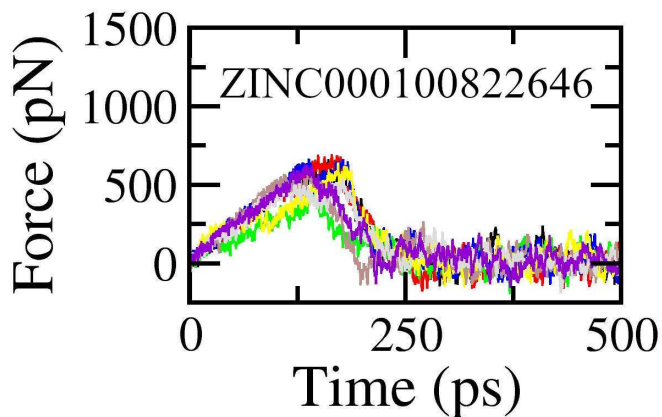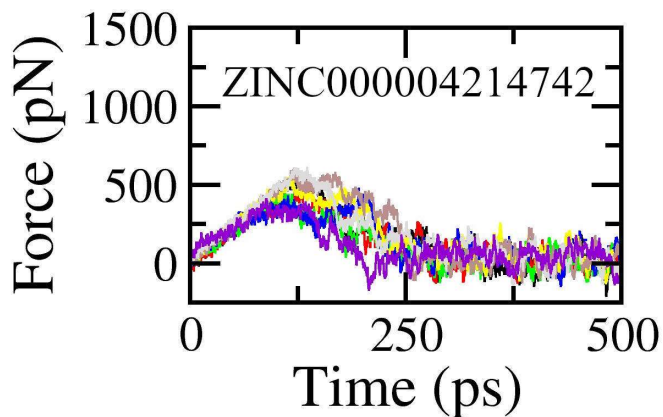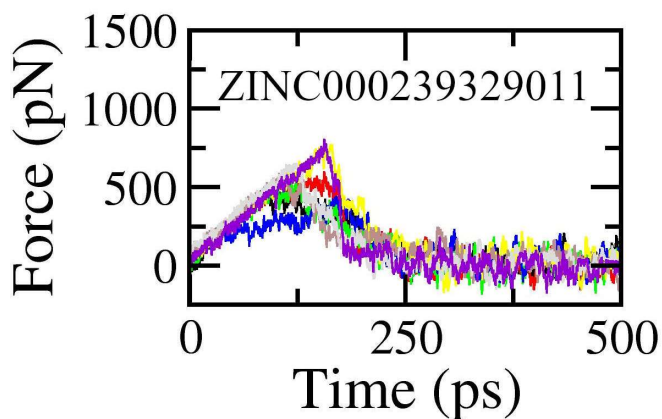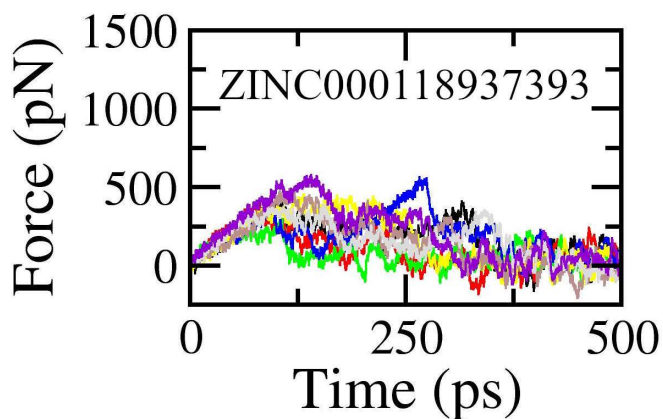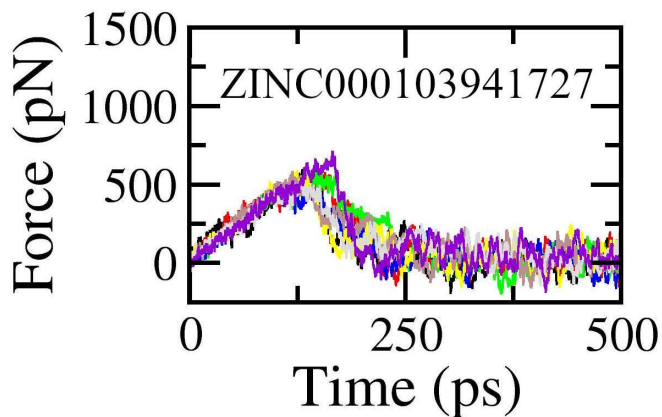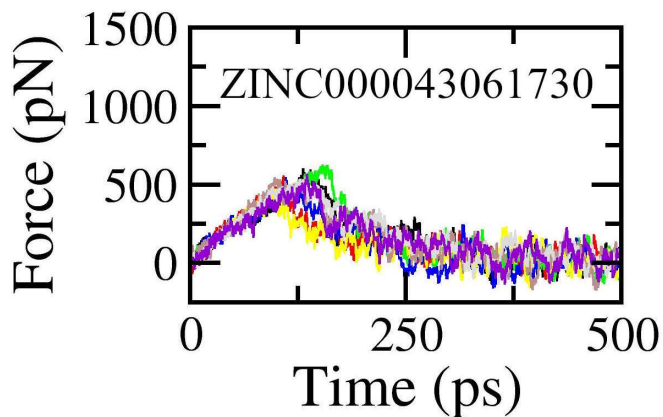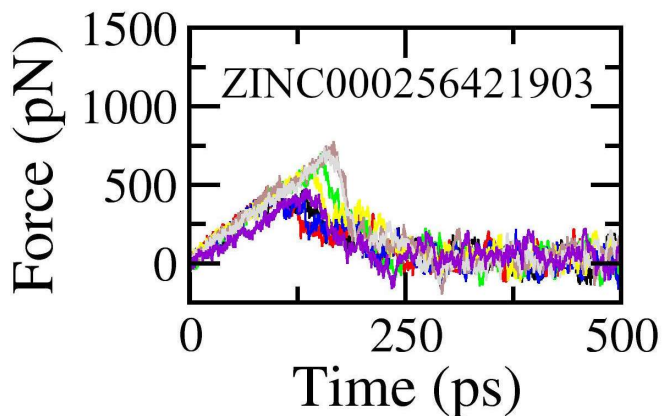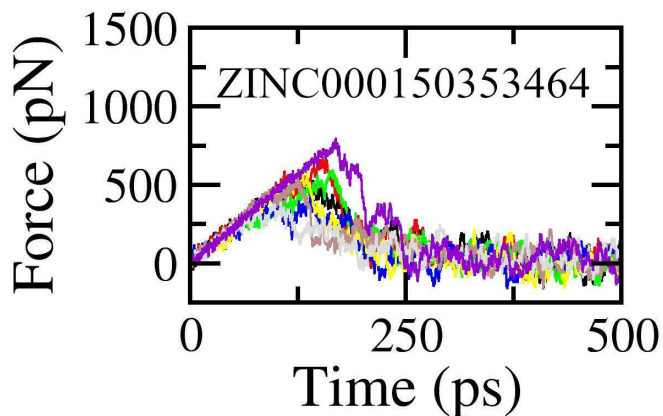

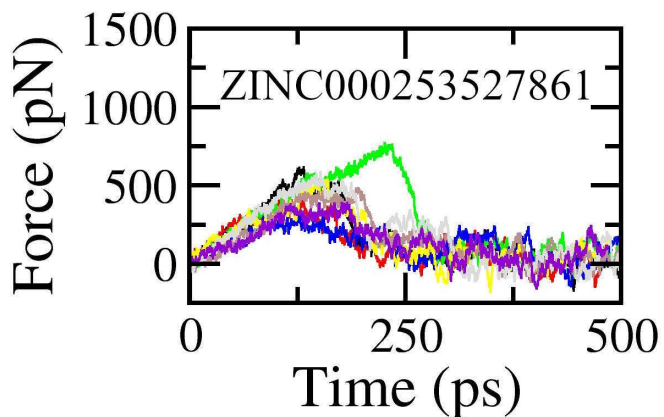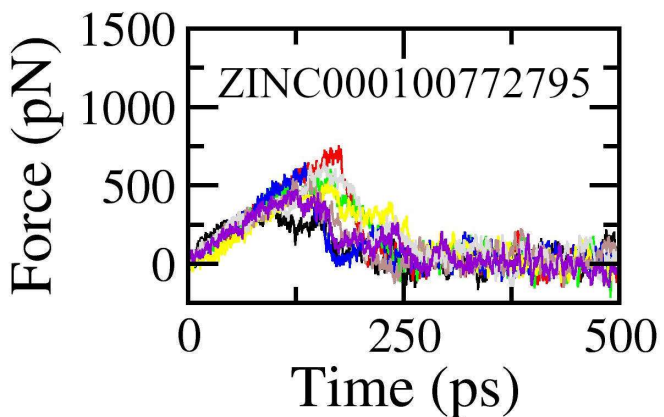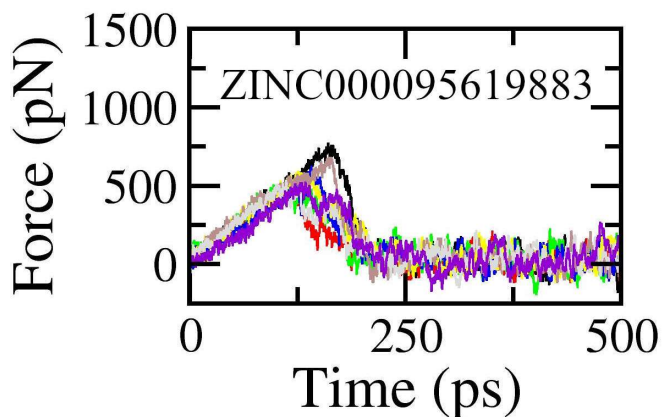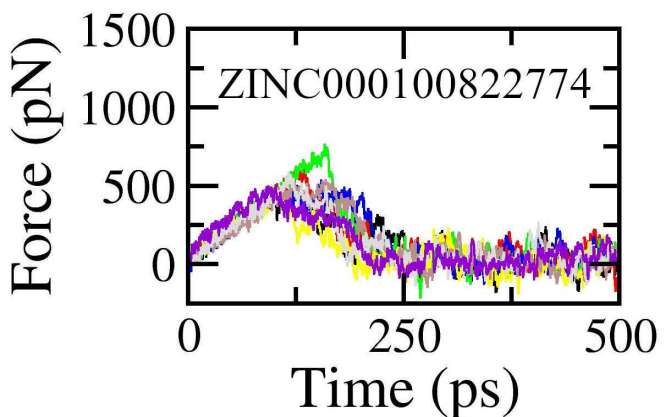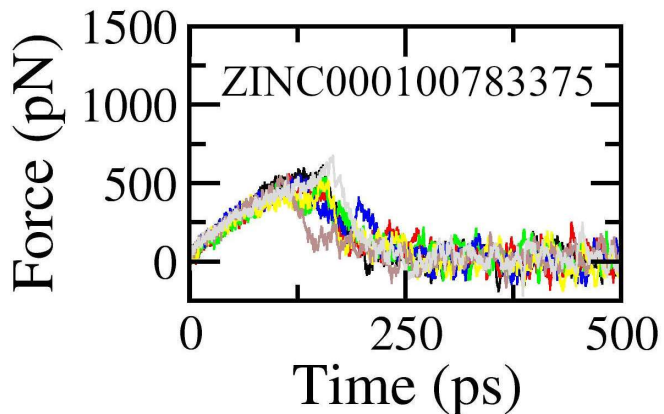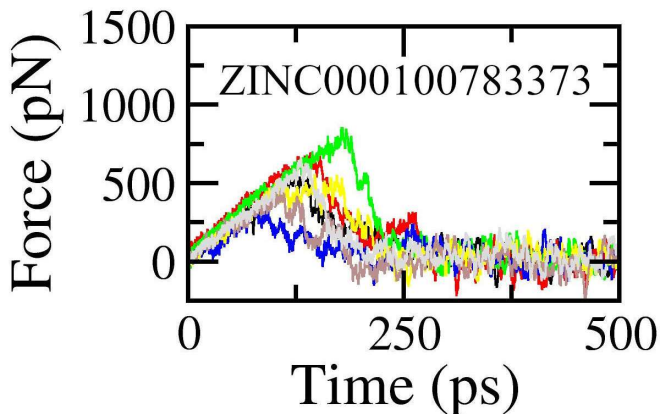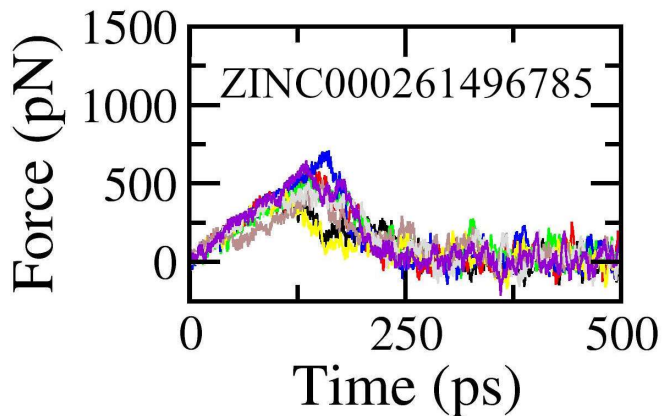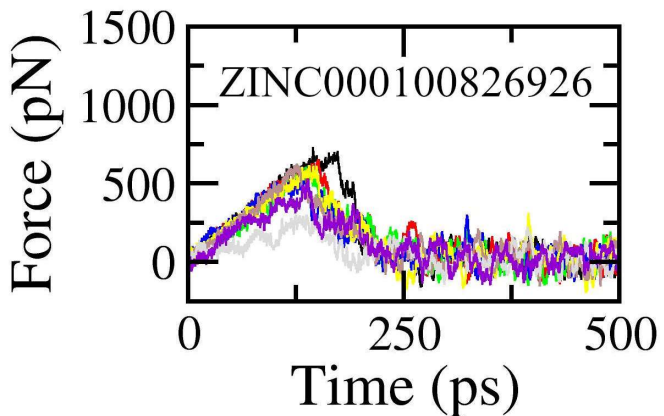

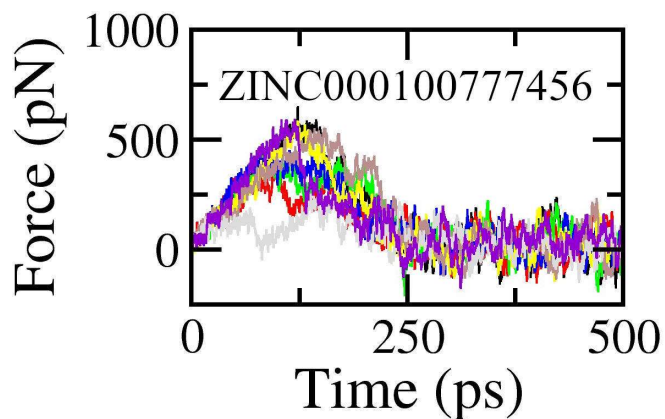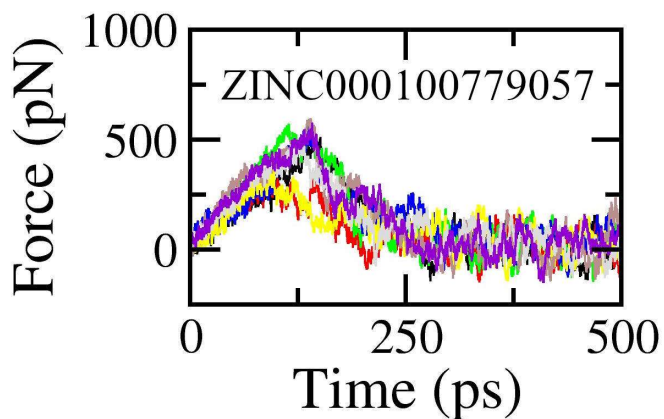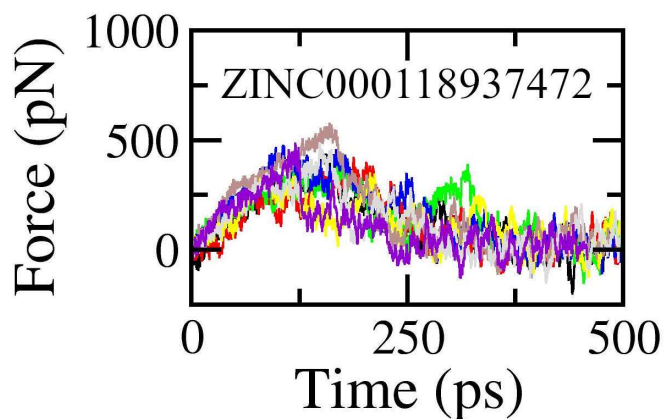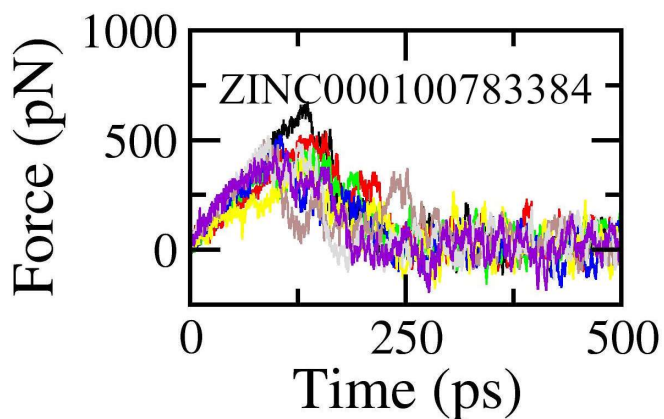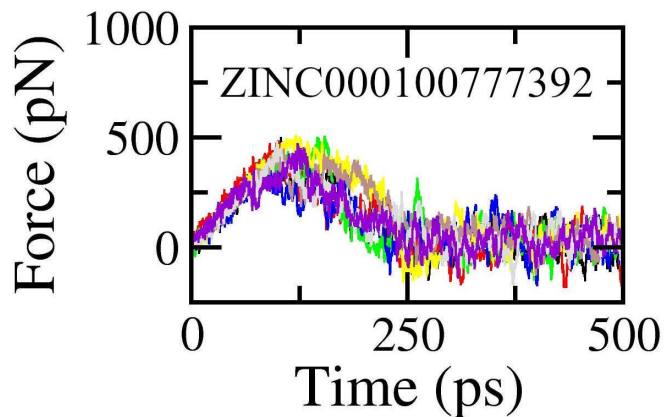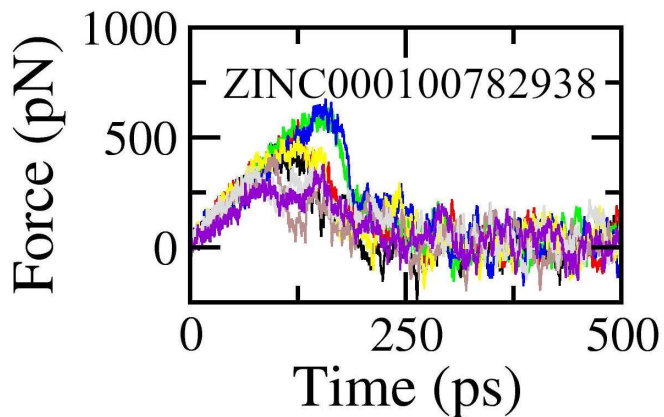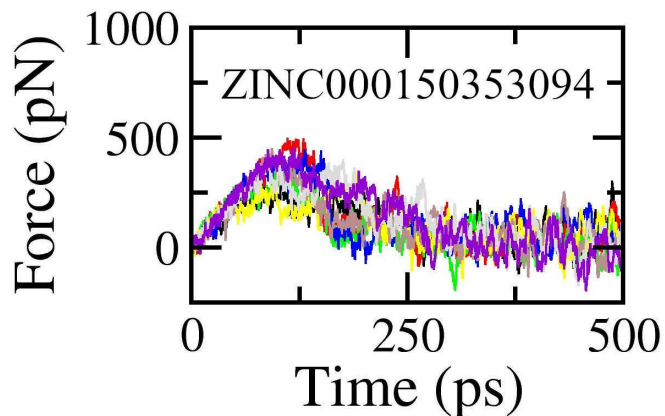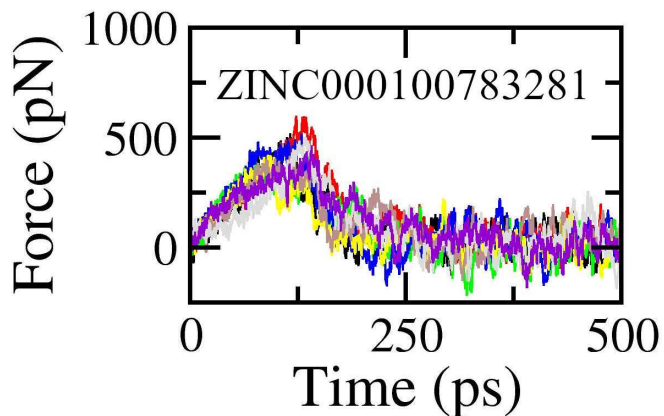

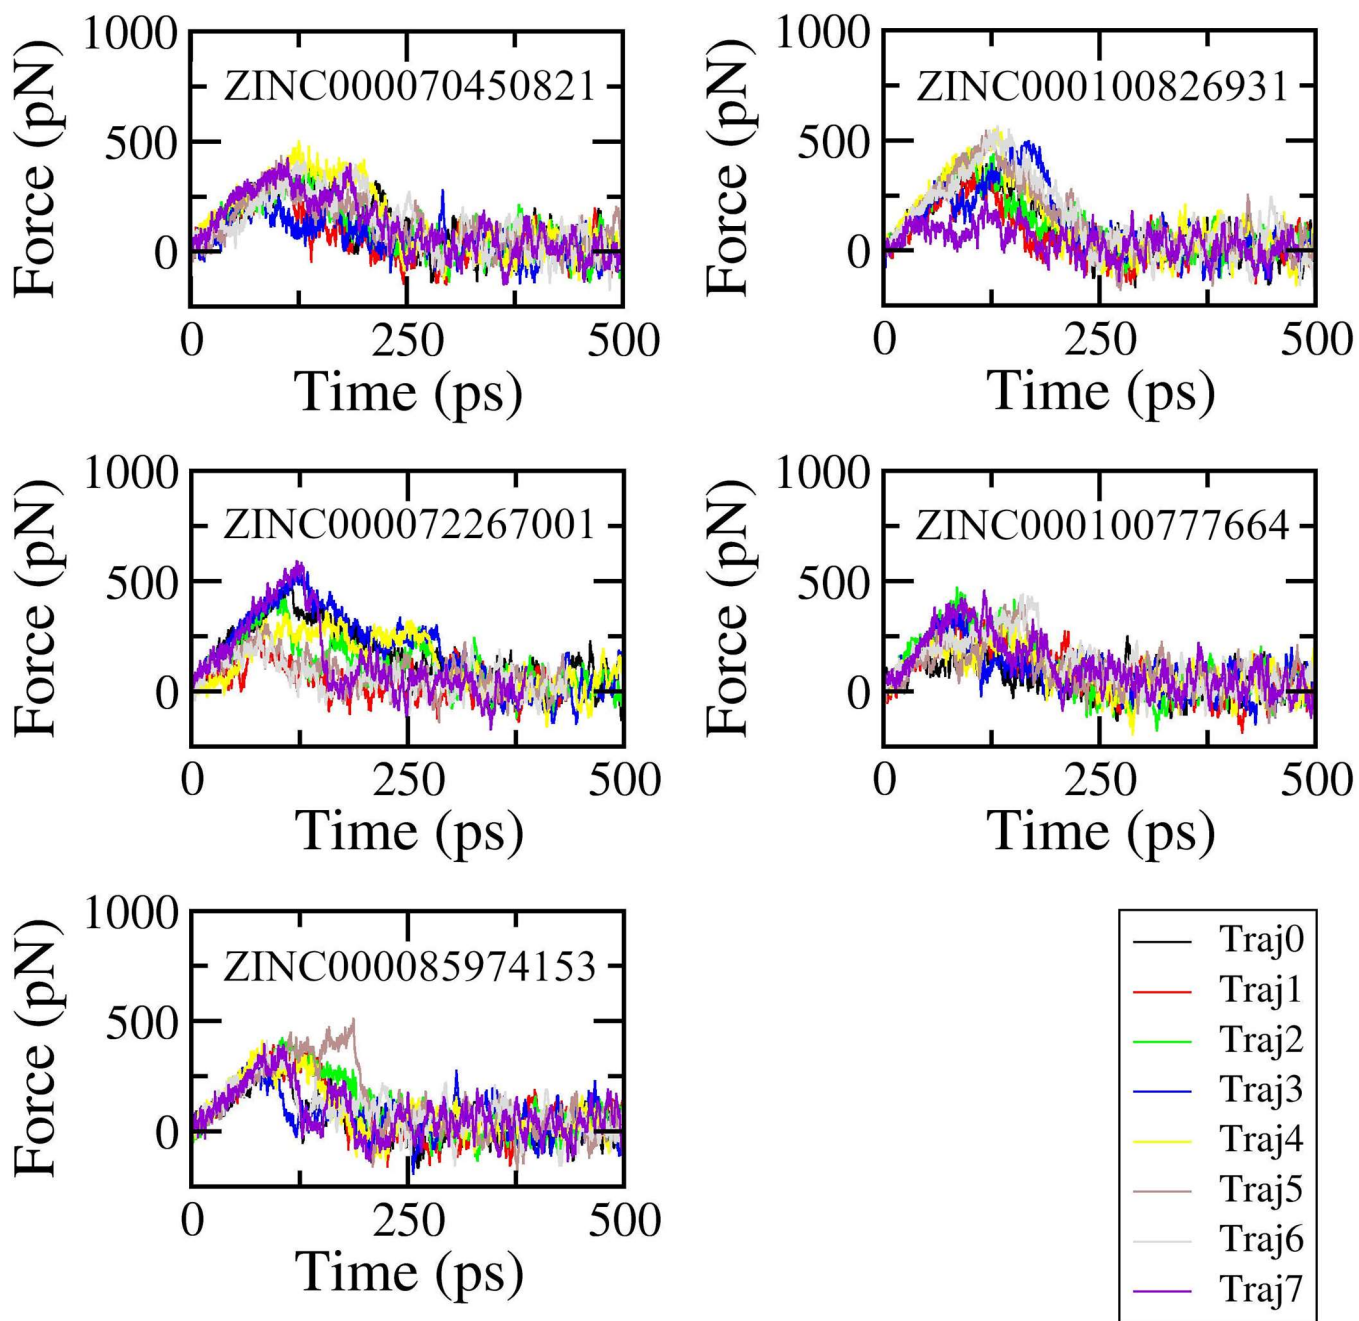

**Figure S2.** Externally pulling forces in time dependence over 8 independent FPL trajectories.
